# Supplementary material for: Enhanced detection of accounting fraud using a CNN-LSTM-Attention model optimized by Sparrow search
Source: PeerJ journal article supplement (doi:10.7717/peerj-cs.2532), 2024-11-26
Supplement: code.zip [file data.xlsx]

## Sheet: Sheet1
Feature 1	Feature 2	Feature 3	Feature 4	Feature 5	Feature 6	Feature 7	Feature 8	Feature 9	Feature 10	Feature 11	Feature 12	Category
4.18826	2.685	37.9822	23.9362	43590.4	3.50703e+06	3.20107	47.6184	7.00861e-06	1.15762e-05	-87.9098	-18.0491	1
4.2027	2.06198	40.0414	24.0693	41457.4	3.41635e+06	7.52629	75.072	4.686e-05	0.000119427	-2160.05	68.4095	2
4.1857	2.41772	38.8423	23.82	39445.2	3.36332e+06	5.46416	75.9854	3.20495e-05	0.000137723	-506.744	21.1573	3
4.20222	2.1417	40.3667	23.2618	38367.3	3.21952e+06	7.80686	88.002	4.22161e-05	7.60366e-05	-2165.35	178.767	3
4.18417	2.31943	36.9802	23.5294	42146.1	3.22432e+06	5.25428	64.9775	3.36667e-05	0.00045593	-564.71	5.3996	2
4.19968	2.65845	38.34	23.973	42825.4	3.4694e+06	4.30894	66.9849	2.62573e-05	0.000163572	-152.08	-25.8687	2
4.19875	2.66825	39.6371	23.8788	38837.9	3.33977e+06	4.37669	76.5607	2.65501e-05	4.6519e-05	-151.154	2.42395	3
4.18317	2.48922	39.4417	23.9727	37394.8	3.38388e+06	5.27841	78.4125	3.15705e-05	6.27288e-05	-431.364	3.08601	3
4.19664	1.73703	39.6417	23.7951	44424.3	3.60462e+06	4.23849	51.9835	1.48062e-05	1.72914e-05	-451.467	3.23513	1
4.18648	2.38296	37.3368	23.7247	41906.8	3.28062e+06	5.26483	66.7589	3.18471e-05	0.000452783	-526.089	6.96901	2
4.20233	2.19148	40.2789	23.7841	39654.9	3.33709e+06	7.71155	82.9139	4.01342e-05	6.18516e-05	-2139.77	138.448	3
4.18839	2.48793	38.8207	24.5756	45785.4	3.92066e+06	3.40422	47.8092	8.57156e-06	1.25663e-05	-135.468	-28.9972	1
4.18761	2.63214	38.4475	24.5494	45323.9	3.8286e+06	3.29237	46.731	7.11436e-06	1.14163e-05	-98.4794	-28.4239	1
4.19713	2.05065	38.8691	23.7185	43868	3.4692e+06	4.33495	52.0273	6.7822e-06	1.12747e-05	-535.684	16.2893	1
4.19926	2.13613	39.4614	24.0725	43909.7	3.6007e+06	3.91362	52.7409	1.16737e-05	1.48518e-05	-256.011	11.2766	1
4.20179	2.09386	41.8392	24.3917	36291.7	3.32563e+06	8.22898	93.9807	4.38636e-05	5.69454e-05	-2434.69	268.19	4
4.19905	1.90869	40.0164	24.3521	44084.1	3.68393e+06	4.06897	52.445	1.39729e-05	1.70734e-05	-348.668	7.55844	1
4.1883	2.54742	38.6654	24.5187	45547.2	3.87258e+06	3.3219	47.3842	8.1475e-06	1.26304e-05	-111.976	-28.9123	1
4.20251	2.0336	39.7434	23.584	40925	3.30457e+06	7.64511	76.9612	4.53075e-05	0.000131751	-2206.52	88.521	2
4.18648	2.40342	37.2852	23.9623	42840.7	3.3265e+06	4.98905	63.4876	2.99687e-05	0.000364674	-482.284	-3.51769	2
4.19926	2.62618	39.2944	24.2679	40630.5	3.43637e+06	4.427	71.6315	2.70101e-05	0.000177615	-174.638	1.14363	2
4.2029	2.07933	39.4057	23.9822	42249	3.41105e+06	7.05048	71.547	1.75902e-05	0.000123927	-1880.34	37.3465	2
4.20166	2.0931	40.989	23.8792	37682.7	3.28121e+06	8.21725	89.9471	4.37071e-05	5.90406e-05	-2449.75	228.007	4
4.17697	2.49141	37.1679	24.0157	43710.2	3.35741e+06	4.90177	48.7397	5.05395e-06	7.9643e-06	-1029.51	21.0862	1
4.19099	2.45078	39.1611	24.2978	38474.1	3.41867e+06	5.40403	75.5995	3.19715e-05	7.66751e-05	-460.559	15.2465	3
4.19245	2.6355	40.585	24.3378	36987.7	3.37668e+06	4.38751	79.4447	2.70879e-05	6.19993e-05	-156.562	0.463189	4
4.19925	2.65645	39.3496	24.4651	40712.5	3.46852e+06	4.38155	70.9593	2.63836e-05	0.000158356	-156.448	-0.50887	2
4.17562	2.31662	38.5215	23.9316	41070	3.3749e+06	5.61919	70.9163	9.53523e-06	4.18248e-05	-849.17	133.768	2
4.18772	2.40067	37.0804	23.5202	42563.5	3.25562e+06	5.08499	64.8151	3.08513e-05	0.000298315	-497.987	-3.78476	2
4.18325	2.43081	40.6316	24.191	35522.7	3.41369e+06	5.24037	82.9228	3.50574e-05	5.00223e-05	-436.859	-1.14442	4
4.20037	2.13627	41.5521	24.1408	36292.1	3.27837e+06	8.19706	93.9426	4.24141e-05	5.92938e-05	-2411.62	266.351	4
4.18294	2.43733	39.1823	23.9468	37880.3	3.36803e+06	5.3673	77.4025	3.2619e-05	5.92759e-05	-460.202	10.6429	3
4.20275	2.15289	38.7875	23.1898	42351	3.27451e+06	6.82704	72.0238	1.74484e-05	0.000134006	-1698.01	30.9248	2
4.19774	2.65685	40.3365	24.2282	37486.2	3.37236e+06	4.37482	78.6974	2.67493e-05	5.04952e-05	-149.141	-0.0634079	4
4.20148	2.08742	41.2375	23.9935	36973.5	3.27004e+06	8.22732	91.8434	4.39998e-05	5.67653e-05	-2445.93	248.302	4
4.19832	2.65849	40.1427	24.332	38250.4	3.4035e+06	4.39142	77.1286	2.66007e-05	5.41865e-05	-153.163	3.43923	3
4.2016	2.13854	40.4625	23.7513	39032.2	3.30639e+06	7.78207	84.9344	4.20751e-05	6.98162e-05	-2171.26	159.928	3
4.19753	2.69822	40.3867	24.2741	37263.1	3.36949e+06	4.30437	78.8045	2.58729e-05	4.6019e-05	-128.818	-3.50044	4
4.19985	2.65488	38.3147	24.0008	43219.8	3.48439e+06	4.30863	65.8007	2.61675e-05	0.000212496	-157.367	-28.8703	2
4.20205	2.11872	40.4427	23.6424	38831.1	3.28631e+06	7.80987	85.7277	4.31127e-05	6.22715e-05	-2182.1	165.944	3
4.18843	2.47283	41.3968	25.0105	35689.3	3.56921e+06	5.19653	82.7406	3.40717e-05	4.35748e-05	-420.63	0.502569	4
4.19767	2.68238	39.6196	23.6681	37787.4	3.26049e+06	4.34324	77.7721	2.62982e-05	7.56651e-05	-140.958	0.38255	3
4.17292	2.4288	39.7884	26.6029	41856.4	3.79464e+06	5.08236	63.5741	2.85088e-05	0.000522832	-515.423	15.7736	2
4.20152	2.16211	41.0672	23.9821	37832.2	3.32647e+06	7.81146	89.129	4.12042e-05	6.11176e-05	-2153.35	194.963	3
4.20258	2.1559	39.4191	23.7248	41661.6	3.32979e+06	7.3947	73.2969	5.21492e-05	0.000145551	-2080.08	59.7464	2
4.18734	2.54711	38.111	23.8115	43260.1	3.4683e+06	3.33769	48.178	7.98363e-06	1.17726e-05	-140.438	-15.1007	1
4.18186	2.39303	39.2005	24.1157	38174.4	3.39602e+06	5.42772	76.5457	3.36102e-05	6.19421e-05	-485.382	13.3376	3
4.20112	2.67416	39.839	24.4729	38879.3	3.41612e+06	4.39051	74.7031	2.61139e-05	0.000103143	-146.293	4.78443	3
4.1832	2.43685	39.4095	24.0049	37529.7	3.38299e+06	5.34807	78.1307	3.29517e-05	5.94944e-05	-454.113	7.24399	3
4.20233	2.0213	40.0725	23.7082	40898.1	3.35639e+06	7.6727	78.2833	4.61323e-05	0.000132258	-2218.09	90.4719	2
4.19852	2.68881	39.2628	23.406	38391.4	3.2353e+06	4.34082	77.1885	2.60854e-05	5.88009e-05	-139.173	0.916518	3
4.20179	2.10663	38.4825	22.9699	41481.4	3.16262e+06	7.69851	73.4933	1.75001e-05	0.000124648	-2411.17	62.1803	2
4.1994	2.61279	38.3987	23.4394	42077.6	3.35404e+06	4.37248	69.6858	2.7506e-05	0.000204942	-178.399	-20.1844	2
4.1971	2.69801	40.8445	24.583	36410	3.38968e+06	4.28938	79.2146	2.64025e-05	4.67759e-05	-125.906	-6.48437	4
4.20037	2.07935	41.6887	24.0993	35843.7	3.25436e+06	8.2338	95.1848	4.42251e-05	5.89623e-05	-2437.22	280.813	4
4.19825	2.02707	39.4126	23.9808	43323	3.50386e+06	4.33828	53.5079	6.77685e-06	1.15283e-05	-506.199	23.6802	1
4.20086	2.16464	41.4339	24.1164	36706.3	3.29975e+06	8.1782	93.0577	4.12137e-05	5.56858e-05	-2399.15	253.483	4
4.18929	2.5725	38.5825	24.7331	43952.5	3.68582e+06	3.31364	46.7737	7.87987e-06	1.2215e-05	-120.422	-18.4305	1
4.19785	2.6363	40.4327	24.2575	37331.2	3.3711e+06	4.40371	78.8972	2.73261e-05	4.56354e-05	-158.923	1.26055	4
4.19912	2.67054	38.1798	23.2148	41257.3	3.25502e+06	4.3053	70.4219	2.62493e-05	0.000206078	-143.206	-10.7218	2
4.20258	2.14304	39.6631	23.8574	41288.1	3.35581e+06	7.51616	74.8708	4.10594e-05	0.000167301	-2121.45	75.3284	2
4.19802	2.11179	39.8038	24.2555	45828.6	3.94911e+06	3.8415	52.2815	1.12622e-05	1.51532e-05	-214.518	-23.2755	1
4.17825	2.28019	38.978	24.6342	46161.4	3.79458e+06	3.82338	47.9783	4.99992e-06	8.9047e-06	-434.023	-5.28745	1
4.18678	2.34017	37.5987	23.9477	42152.9	3.33911e+06	5.26092	66.1075	3.29612e-05	0.000307284	-551.129	3.14952	2
4.20285	2.65948	40.9987	25.0507	37265.5	3.50138e+06	4.38622	77.8889	2.63874e-05	4.44202e-05	-142.112	-0.37885	4
4.18922	2.55285	38.527	24.5616	44795.6	3.76432e+06	3.32958	46.9761	8.03922e-06	1.21096e-05	-118.739	-23.6406	1
4.19811	1.78688	40.1657	24.1252	43994.2	3.65282e+06	4.20483	52.9536	1.55336e-05	1.76035e-05	-426.989	8.5754	1
4.19707	2.10585	39.3594	24.3063	44823.4	3.72726e+06	3.87755	50.9059	1.08035e-05	1.42596e-05	-249.122	-3.89481	1
4.17626	2.32734	37.2723	23.7626	43042.2	3.318e+06	5.12617	50.45	9.32489e-06	1.13259e-05	-1125.31	25.897	2
4.20525	2.05882	41.8975	24.7733	37336.8	3.42301e+06	8.25696	90.5445	4.48897e-05	5.57687e-05	-2469.14	240.973	4
4.20221	2.18329	40.3173	23.7804	39361.7	3.31946e+06	7.73297	83.6708	4.03175e-05	6.47562e-05	-2146.42	148.059	3
4.20001	2.66173	38.0725	23.5145	42392.5	3.35329e+06	4.30114	67.8339	2.64064e-05	0.000222762	-148.741	-21.9806	2
4.18988	2.64956	38.522	24.7404	44246.9	3.71843e+06	3.2354	46.6446	7.28864e-06	1.13887e-05	-90.0968	-21.2734	1
4.18756	2.47131	38.1883	23.7548	43178.1	3.46043e+06	3.4081	48.4296	8.60205e-06	1.28451e-05	-170.827	-14.1256	1
4.1889	2.5739	38.3193	24.3573	43242.3	3.53812e+06	3.30137	47.2011	7.89701e-06	1.20766e-05	-122.834	-14.9923	1
4.202	2.1561	40.4313	23.7619	39177.3	3.31679e+06	7.76434	84.5844	4.14458e-05	6.31324e-05	-2161.09	154.504	3
4.18819	2.65192	38.8188	24.7343	45851.6	3.95852e+06	3.19605	47.2503	7.39871e-06	1.26412e-05	-70.781	-31.1636	1
4.19921	1.95059	39.9516	24.2575	44832.8	3.79324e+06	4.00507	52.1156	1.28304e-05	1.62721e-05	-310.169	-8.32559	1
4.22252	2.47902	40.7727	24.0582	37998.8	3.57043e+06	5.44357	84.1569	3.2626e-05	9.56242e-05	-422.599	1.96658	4
4.18303	2.45245	40.5775	24.7137	36529.6	3.49247e+06	5.26834	80.6599	3.34342e-05	4.71641e-05	-438.316	15.1358	4
4.20104	2.11715	41.1395	24.213	35871.1	3.2163e+06	8.21176	92.9397	4.29834e-05	5.70085e-05	-2417.14	275.39	4
4.19905	2.6623	39.875	24.0004	37933.1	3.31924e+06	4.38149	77.1971	2.6669e-05	7.50624e-05	-150.705	3.67974	3
4.18763	2.50278	38.9923	24.9175	44856.1	3.86412e+06	3.43749	47.4146	7.96811e-06	1.18792e-05	-158.637	-23.1416	1
4.2027	2.00675	40.0571	23.6793	40361.2	3.30933e+06	7.77602	79.195	4.67182e-05	0.000167321	-2247.1	115.979	2
4.20123	2.12954	41.0137	23.9808	37535	3.29264e+06	8.19216	90.3716	4.24349e-05	5.52217e-05	-2424.82	230.758	4
4.18324	2.41119	39.5868	23.8967	37018.5	3.36681e+06	5.34407	79.1098	3.42806e-05	6.62996e-05	-458.566	3.40797	3
4.19699	2.68836	40.6994	24.3752	36651.5	3.37418e+06	4.30619	79.5643	2.6284e-05	4.60275e-05	-130.878	-6.11014	4
4.20205	2.03766	41.4003	24.4812	38158.6	3.39114e+06	8.25676	87.8539	4.57362e-05	6.14897e-05	-2497.63	216.64	3
4.18611	2.35351	37.3523	23.239	41342.7	3.20756e+06	5.3574	69.2512	3.30926e-05	0.000337033	-546.573	9.37485	2
4.17758	2.3406	38.6598	24.4065	44971.3	3.64752e+06	4.42568	50.2384	5.48105e-06	8.66772e-06	-761.168	10.2765	1
4.18261	2.44486	40.9904	24.2098	35998.8	3.50243e+06	5.24719	83.888	3.41623e-05	5.07475e-05	-433.4	-14.0383	4
4.19873	2.64032	39.6993	23.9773	38989.1	3.36259e+06	4.41956	76.2839	2.69268e-05	5.29648e-05	-167.038	5.42486	3
4.18654	2.36593	38.6694	24.7885	41115.4	3.46486e+06	5.38136	68.4653	3.21794e-05	0.00031141	-566.886	24.0929	2
4.19901	1.85755	39.6289	23.932	43499.6	3.52121e+06	4.15227	53.323	6.83348e-06	1.2341e-05	-396.022	18.798	1
4.19961	2.65822	39.1049	24.1439	40415.5	3.39618e+06	4.37953	71.9231	2.71024e-05	0.00014599	-156.421	2.26771	2
4.19834	2.66551	38.8393	23.9716	40994.4	3.38321e+06	4.34607	70.7159	2.6142e-05	0.000165123	-148.777	-1.57537	2
4.17729	2.35153	39.2462	24.6382	46628.7	3.89644e+06	3.41545	48.0515	4.63527e-06	9.36891e-06	-237.958	-15.3943	1
4.19895	2.62877	38.9649	24.1216	41126	3.41496e+06	4.40217	70.344	2.68574e-05	0.000203336	-171.821	-2.27123	2
4.19993	2.67201	39.8853	25.6991	42394.9	3.76139e+06	4.333	66.2309	2.56175e-05	0.000174441	-151.847	-11.7197	2
4.18389	2.41985	40.517	24.4526	36311.1	3.45481e+06	5.29406	81.4971	3.46536e-05	5.07733e-05	-448.486	12.6068	4
4.20244	2.04299	39.0469	23.739	43019.5	3.4081e+06	6.09144	69.437	1.70897e-05	0.000146654	-1137.72	8.79406	2
4.19837	2.63134	40.5689	24.7354	38084.1	3.47234e+06	4.43293	77.37	2.68598e-05	4.48928e-05	-164.061	5.94545	3
4.20178	2.10077	40.165	23.1584	38356.3	3.18518e+06	7.83975	87.0708	4.36049e-05	9.89784e-05	-2192.97	176.987	3
4.19899	2.63909	39.398	24.0806	40222.9	3.40799e+06	4.41104	73.6997	2.69797e-05	4.96664e-05	-168.111	3.73033	3
4.19931	2.61572	39.2327	24.328	41285.1	3.48163e+06	4.41911	70.9503	2.72412e-05	0.000181314	-181.368	-3.37085	2
4.2022	2.18879	40.1875	23.8945	39986.7	3.35634e+06	7.68498	81.3418	3.99457e-05	6.62357e-05	-2137.35	127.469	3
4.19772	2.69016	40.4448	24.247	36971.3	3.35154e+06	4.31479	79.0476	2.61247e-05	4.78999e-05	-131.791	-3.3576	4
4.1988	2.69893	39.5608	23.9273	38907.1	3.34054e+06	4.32743	76.0195	2.56316e-05	4.73567e-05	-135.308	1.85481	3
4.2	2.61597	37.9067	23.5661	42778.5	3.36328e+06	4.36371	66.3525	2.76627e-05	0.000206594	-177.969	-20.3482	2
4.20279	1.97862	38.8368	23.4876	42827	3.33749e+06	6.34086	69.2894	1.71081e-05	0.000167376	-1324.99	14.9042	2
4.19802	2.67196	40.8421	24.6829	36818.8	3.4215e+06	4.33939	78.8649	2.63799e-05	4.41687e-05	-137.217	-1.83667	4
4.17812	2.44048	38.9992	24.7041	46494.8	3.86094e+06	3.51822	47.8097	4.77655e-06	9.57492e-06	-289.084	-10.7628	1
4.18439	2.44829	38.9544	24.295	40117.3	3.44211e+06	5.41452	73.6747	3.07989e-05	0.000200715	-505.273	20.5691	2
4.17286	2.48631	37.2071	23.7738	42918.6	3.33652e+06	5.08216	51.0105	7.69872e-06	1.0983e-05	-1075.83	25.5996	2
4.18257	2.49153	40.6679	23.8294	36026.4	3.43538e+06	5.20463	84.1382	3.28951e-05	6.01981e-05	-417.532	-17.7167	4
4.20107	2.62892	38.458	23.7813	44074.3	3.57984e+06	4.32379	67.563	2.67619e-05	0.000124502	-161.691	-44.111	1
4.18459	2.43243	39.3527	24.2449	39149.4	3.46003e+06	5.44248	76.5468	3.18274e-05	0.000175683	-487.25	17.3602	3
4.19641	2.64512	41.197	24.8514	36487.2	3.45384e+06	4.36763	79.6202	2.7144e-05	4.4863e-05	-149.564	-2.96389	4
4.20257	2.114	40.5829	23.713	37948.7	3.25232e+06	7.84749	87.4684	4.32416e-05	0.000148706	-2183.47	191.875	3
4.20199	2.18674	39.9521	23.553	38558.5	3.22296e+06	7.77448	84.875	4.02636e-05	0.000149709	-2143.4	172.569	3
4.17982	2.47577	39.163	24.2771	46723.2	3.88124e+06	3.17233	48.4467	4.36212e-06	8.66967e-06	-124.859	-22.5246	1
4.20291	2.12187	40.2407	23.8403	40300.7	3.36292e+06	7.69113	80.5922	4.21579e-05	6.51145e-05	-2170.22	115.015	3
4.20128	1.99291	39.8475	23.7391	41062.3	3.33328e+06	7.65666	76.1347	4.68938e-05	0.000146348	-2233.77	83.224	2
4.19041	2.60516	40.7122	26.6474	42340	3.95702e+06	4.42328	65.4235	2.638e-05	0.000231789	-210.882	-9.43924	2
4.20042	2.62907	40.5224	24.7193	38258.3	3.47867e+06	4.45409	77.0036	2.66516e-05	4.87305e-05	-167.639	5.39093	3
4.19943	2.66297	38.6075	24.0192	41469.3	3.39742e+06	4.34199	69.2537	2.61001e-05	0.000164654	-152.861	-5.99292	2
4.202	2.17395	40.1461	23.7474	39812.8	3.32375e+06	7.7059	82.0515	4.04365e-05	6.44223e-05	-2147.85	132.67	3
4.18457	2.44372	39.4665	24.4429	39258.3	3.47409e+06	5.43656	75.6624	3.14417e-05	0.000268968	-486.693	20.5548	3
4.20314	2.14042	39.8985	23.8682	40497.1	3.34002e+06	7.65416	78.3548	4.21787e-05	0.000143407	-2156.42	107.362	2
4.19696	1.7952	40.313	24.6503	44953.4	3.84598e+06	4.17492	51.5257	1.40297e-05	1.68817e-05	-412.324	-3.59988	1
4.1835	2.45061	39.5387	23.9594	37213.9	3.38048e+06	5.31231	78.7549	3.28701e-05	6.37996e-05	-444.605	3.30122	3
4.20159	2.05027	41.2508	24.2284	37984.1	3.34761e+06	8.24595	88.7239	4.54507e-05	6.07273e-05	-2481.99	221.755	3
4.1776	2.36998	38.6476	24.3473	43351	3.50394e+06	5.328	52.7951	5.61913e-06	8.86611e-06	-1366.65	32.4322	1
4.20031	2.64792	39.4398	23.9045	38763.7	3.31409e+06	4.4253	75.6575	2.68638e-05	0.000181508	-161.592	7.13348	3
4.20314	2.15845	38.4998	23.2596	42616.6	3.27708e+06	6.51517	70.125	1.75457e-05	0.000196084	-1458.21	22.7204	2
4.203	2.16374	38.6996	23.7341	43432.3	3.41133e+06	5.4803	67.1544	1.70081e-05	0.000169964	-729.605	-4.81711	2
4.18473	2.47452	38.7314	24.1055	39910.5	3.39785e+06	5.38984	73.891	3.02066e-05	0.000191149	-485.437	20.3423	3
4.18819	2.29217	37.4961	23.7569	42918.4	3.30858e+06	5.15993	50.9115	1.22689e-05	8.77278e-06	-1134.96	26.945	2
4.17637	2.43602	38.7261	24.565	45280.8	3.7055e+06	4.14872	49.6477	5.08542e-06	8.12699e-06	-588.573	5.58173	1
4.20097	2.05851	41.9882	24.3638	35846.6	3.30328e+06	8.25098	95.3361	4.53325e-05	5.6287e-05	-2450.38	281.758	4
4.19277	2.00696	41.6355	24.9588	36115.8	3.32045e+06	8.29076	91.1493	4.67834e-05	0.000134589	-2502.68	277.188	4
4.17744	2.1884	38.8469	24.4509	43846.8	3.56597e+06	5.05265	51.9239	5.90784e-06	9.50263e-06	-1145.23	25.4652	1
4.17722	2.21867	37.6702	24.5677	45003.6	3.56661e+06	4.54577	46.8955	6.14795e-06	7.88986e-06	-840.7	9.95008	1
4.20129	2.1992	41.0209	24.0114	37286.8	3.28931e+06	8.14803	91.0895	3.97294e-05	5.75677e-05	-2384.87	235.493	4
4.19693	2.6937	41.022	24.8439	35984.8	3.4017e+06	4.27916	78.9271	2.60628e-05	4.32157e-05	-121.37	-5.96846	4
4.18927	2.45568	38.5466	24.355	42949.8	3.52439e+06	3.41559	47.7009	8.78071e-06	1.2244e-05	-173.726	-12.2415	1
4.19038	2.39975	37.2898	24.03	44837.1	3.45558e+06	4.66972	47.8525	5.48377e-06	7.98144e-06	-902.311	10.8189	1
4.20151	2.00772	41.9027	24.6043	37008.2	3.38087e+06	8.29397	91.6723	4.70653e-05	5.74645e-05	-2503.19	253.035	4
4.18767	2.54176	38.1942	23.8013	43001.1	3.45001e+06	3.33738	48.5241	8.14485e-06	1.2136e-05	-139.44	-13.4717	1
4.19744	2.69117	40.4338	24.2605	37111.7	3.36192e+06	4.3139	78.9707	2.59391e-05	4.64013e-05	-132.104	-3.20527	4
4.17632	2.47537	38.7513	24.8191	44261.4	3.63628e+06	4.74119	50.726	5.01593e-06	7.32163e-06	-936.823	21.957	1
4.19911	2.69616	39.5354	24.0076	39333.2	3.37181e+06	4.33134	75.3883	2.56217e-05	4.66602e-05	-136.194	1.35358	3
4.19094	2.48207	40.5222	24.6767	36804.8	3.48869e+06	5.2809	80.4072	3.21069e-05	4.81583e-05	-428.138	18.6648	4
4.17203	2.40073	41.4549	24.267	35320.1	3.49375e+06	5.2096	86.2031	3.60909e-05	0.000126977	-453.998	-11.5649	4
4.19895	1.91034	40.1747	24.3349	44235.2	3.72826e+06	4.08853	52.7813	1.31153e-05	1.57686e-05	-350.103	4.26126	1
4.17522	2.35888	37.9036	24.9106	45349.2	3.66408e+06	4.29862	46.5729	5.55622e-06	7.3615e-06	-692.452	7.26302	1
4.19962	2.63126	38.4913	24.2036	43466.1	3.55463e+06	4.33985	65.8433	2.66774e-05	0.000181918	-172.748	-32.1219	2
4.20328	2.12863	39.4812	24.0431	41885.2	3.3892e+06	7.23814	72.1027	1.74573e-05	0.000158338	-1968.5	53.9788	2
4.20175	2.1095	41.0262	23.936	37563.4	3.2826e+06	8.20565	90.2948	4.32225e-05	5.82343e-05	-2438.25	231.54	4
4.19815	2.68925	39.4179	23.814	38562.3	3.29312e+06	4.34447	75.8777	2.60077e-05	8.88896e-05	-138.635	3.9317	3
4.18893	2.6652	38.5171	24.7113	45127.2	3.81664e+06	3.20172	46.5897	7.25087e-06	1.23116e-05	-75.1338	-25.743	1
4.19896	1.86882	40.052	24.1896	44796.3	3.77894e+06	4.09303	52.3223	1.36693e-05	1.70861e-05	-356.164	-6.63122	1
4.19796	2.67157	40.1844	24.1488	37663.3	3.35809e+06	4.3537	78.3559	2.62226e-05	4.77461e-05	-141.992	0.140044	4
4.19795	2.64455	40.9978	24.8452	36936.4	3.45942e+06	4.38672	78.8276	2.68447e-05	4.37545e-05	-151.015	0.627423	4
4.18398	2.47068	40.3433	24.2247	36162.5	3.41505e+06	5.2379	81.6207	3.35337e-05	4.86478e-05	-426.278	7.24617	4
4.18584	2.47097	38.0654	23.2013	40107.2	3.22705e+06	5.32199	74.2122	3.04251e-05	0.000386533	-470.027	17.4461	2
4.19852	2.16576	39.2253	23.9768	43371.4	3.50122e+06	4.24384	53.4215	6.40551e-06	1.00441e-05	-453.781	22.9339	1
4.17856	2.47916	38.8436	24.6484	46289.2	3.81635e+06	3.65715	48.049	4.70951e-06	8.46058e-06	-351.583	-7.4986	1
4.18267	2.45986	41.2169	24.3423	35003	3.46048e+06	5.18481	84.612	3.48814e-05	4.93754e-05	-425.533	-11.7641	4
4.19835	2.6984	40.278	24.4941	38009.6	3.42175e+06	4.32111	77.335	2.53977e-05	4.85911e-05	-129.192	0.901226	3
4.17458	2.20336	37.5432	24.5116	45743.4	3.62136e+06	4.08201	45.6164	5.74231e-06	8.10142e-06	-571.03	1.23726	1
4.2046	2.19793	41.4705	24.9521	36414	3.34964e+06	8.1708	90.6629	3.97179e-05	7.25186e-05	-2383.65	261.553	4
4.18248	2.41048	40.3704	23.6383	35931.1	3.37699e+06	5.29173	83.6612	3.53081e-05	0.000110176	-447.129	-11.045	4
4.19945	2.6951	39.0463	23.9341	40405.2	3.36526e+06	4.31978	72.2237	2.56099e-05	0.000198747	-133.656	0.332264	2
4.17345	2.13873	37.5158	23.8977	43373.2	3.35214e+06	5.13296	49.6234	1.4067e-05	9.07776e-06	-1178.47	22.8022	1
4.17668	2.33972	37.3417	24.2243	44499.8	3.45837e+06	4.76378	47.7037	5.75568e-06	8.29803e-06	-972.449	14.3823	1
4.18259	2.42151	40.7116	24.1664	36392.8	3.49402e+06	5.29118	83.0038	3.4687e-05	7.28125e-05	-446.487	-8.282	4
4.20022	2.03058	42.0409	24.5685	36124.2	3.34456e+06	8.27373	94.2331	4.65271e-05	6.20682e-05	-2472.21	275.039	4
4.1994	2.69268	38.0415	23.2362	41437.3	3.25881e+06	4.26992	69.6009	2.57706e-05	0.000241706	-130.574	-13.5662	2
4.18154	2.45989	40.7288	24.2078	35265.1	3.40903e+06	5.2007	83.0408	3.43778e-05	5.10933e-05	-425.944	-4.19481	4
4.20212	2.03726	38.5697	23.0725	41859.3	3.19232e+06	7.35907	71.6575	1.7404e-05	0.000150739	-2124.25	50.1036	2
4.18474	2.35186	37.395	23.5097	41535.8	3.24257e+06	5.33113	67.8398	3.27966e-05	0.000393197	-548.912	7.46921	2
4.2029	2.16327	38.3457	22.9836	41657	3.16474e+06	7.53232	72.5694	1.74011e-05	0.000129135	-2269.13	58.0444	2
4.1991	2.67497	37.8619	23.54	43048.8	3.3936e+06	4.27363	66.5486	2.6115e-05	0.000235947	-141.62	-30.0004	2
4.20229	1.99254	40.2722	24.0186	40682.2	3.37956e+06	7.74118	77.3595	4.72773e-05	0.000174546	-2249.24	99.6321	2
4.20067	2.07588	41.8034	24.3431	35991.9	3.29467e+06	8.24009	94.4796	4.47014e-05	5.62262e-05	-2441.78	276.882	4
4.20281	2.18014	39.6677	24.5019	42189.6	3.47709e+06	6.97433	70.3862	1.7117e-05	0.000158347	-1771.13	47.4663	2
4.185	2.39185	38.3404	24.2225	40972.7	3.40807e+06	5.37093	70.3524	3.24628e-05	0.000259203	-521.903	9.27555	2
4.2018	2.13856	41.0492	23.9992	37417.8	3.28809e+06	8.18871	90.5567	4.2321e-05	5.6665e-05	-2419.2	234.392	4
4.20067	1.99595	42.24	24.6721	36247.7	3.38073e+06	8.3056	94.155	4.7887e-05	5.84986e-05	-2501.25	272.71	4
4.20139	2.09123	40.8827	23.7059	38350	3.30939e+06	7.84908	88.0749	4.41318e-05	8.0334e-05	-2197.4	180.802	3
4.1991	2.66035	38.1168	23.3486	41661.9	3.29415e+06	4.31538	69.3298	2.64789e-05	0.000231335	-148.809	-14.9246	2
4.19955	2.66685	38.8728	24.2561	42023.3	3.49193e+06	4.31063	68.716	2.59255e-05	0.000181707	-146.1	-19.2069	2
4.19623	2.66992	41.0324	24.5786	35933.9	3.37651e+06	4.32003	80.0249	2.69703e-05	4.40283e-05	-135.831	-7.10872	4
4.18228	2.3482	38.517	24.299	40619.1	3.39733e+06	5.45974	70.8477	3.32588e-05	0.000211158	-579.446	24.8853	2
4.18366	2.46667	38.5209	23.9954	40193.1	3.36419e+06	5.37796	73.3789	3.03781e-05	0.000134741	-499.923	23.7414	2
4.20162	2.06474	41.8544	24.4591	36597.7	3.34446e+06	8.25036	93.1288	4.48335e-05	5.73574e-05	-2457.94	262.599	4
4.20103	2.02529	41.3484	24.0117	37076.6	3.28479e+06	8.27954	91.8187	4.67253e-05	6.11116e-05	-2492.23	247.039	4
4.19917	2.64324	39.1401	23.9569	40820.1	3.41013e+06	4.38788	72.5358	2.65307e-05	0.000139467	-162.875	-3.43488	2
4.19669	2.6807	40.8151	24.3358	35640.3	3.31332e+06	4.29087	80.0755	2.67427e-05	4.41727e-05	-127.163	-9.40928	4
4.20275	2.04566	38.6052	23.3098	43217.8	3.32334e+06	5.76577	68.2494	1.72165e-05	0.000220965	-913.845	1.27175	2
4.19652	1.82544	39.1184	23.6418	43763.2	3.45333e+06	4.51508	52.3217	6.98432e-06	1.26349e-05	-647.751	17.7381	1
4.1917	2.4111	38.0371	23.8	41119.1	3.31235e+06	5.3343	70.0347	3.14045e-05	0.000379889	-513.496	15.9743	2
4.19851	2.11102	40.2602	24.2611	45869.8	4.01793e+06	3.94284	52.9591	1.13426e-05	1.60123e-05	-241.713	-24.3454	1
4.20121	2.14216	40.9536	24.0031	37839	3.30346e+06	8.17916	89.1901	4.1897e-05	6.01438e-05	-2421.3	221.762	4
4.18356	2.40179	40.5818	24.1926	35772.6	3.42206e+06	5.28136	82.7312	3.57968e-05	5.01471e-05	-450.101	2.32172	4
4.19149	2.61247	38.9822	24.326	45978.5	3.98729e+06	3.31182	48.9413	7.67181e-06	1.27962e-05	-89.5662	-36.838	1
4.18278	2.46099	40.5658	23.9488	36576.3	3.4642e+06	5.26166	83.3249	3.32547e-05	6.49028e-05	-432.562	-9.10336	4
4.18774	2.50108	38.2755	24.0249	43492.6	3.52777e+06	3.39129	47.9062	8.21415e-06	1.20697e-05	-162.414	-15.6867	1
4.19322	2.43928	38.8399	24.3434	46677.9	3.81449e+06	3.54216	48.5871	4.94118e-06	8.20163e-06	-283.628	-13.7867	1
4.18305	2.39889	40.7432	24.2265	35487.4	3.43009e+06	5.26713	83.2637	3.60896e-05	5.18673e-05	-449.814	-1.78617	4
4.20139	2.00928	41.4059	24.0514	37641.4	3.32899e+06	7.93619	89.6261	4.70826e-05	6.44564e-05	-2253.26	206.277	3
4.19964	2.61294	38.9204	24.0066	41286.9	3.40123e+06	4.41514	70.3012	2.72765e-05	0.000118014	-183.446	-2.15202	2
4.18744	2.62377	38.1653	24.055	44428.3	3.63676e+06	3.27013	47.6978	7.34314e-06	1.19923e-05	-102.174	-23.3359	1
4.19958	2.64299	39.6017	24.074	39464.2	3.38768e+06	4.41561	75.2188	2.66928e-05	4.94862e-05	-165.717	5.16419	3
4.19711	2.64839	41.1121	24.6404	36193.1	3.41003e+06	4.35598	80.0612	2.70985e-05	4.33339e-05	-146.374	-6.18751	4
4.18903	2.60386	38.5263	24.6285	44827.8	3.77899e+06	3.27186	46.813	7.65352e-06	1.18266e-05	-99.5231	-24.6416	1
4.18171	2.40877	40.6167	24.2386	35641.3	3.41982e+06	5.26244	82.6904	3.56142e-05	4.91846e-05	-447.042	1.75486	4
4.20147	2.02878	40.6346	23.3805	37731.3	3.20048e+06	7.91747	88.7209	4.66554e-05	0.000147859	-2238.82	199.315	3
4.19708	1.81327	39.1453	23.4922	43481.9	3.40904e+06	4.84765	53.028	6.86137e-06	1.25085e-05	-865.169	23.3511	1
4.19669	1.97046	38.863	23.4673	43539	3.39878e+06	4.72255	52.8269	6.90443e-06	1.26708e-05	-780.066	22.3091	1
4.19851	2.66676	39.6502	23.9935	39160	3.37015e+06	4.3783	75.9273	2.62648e-05	4.81379e-05	-152.695	3.18868	3
4.19687	2.6341	41.2407	24.6168	35743.2	3.38893e+06	4.36664	80.7839	2.7789e-05	4.32198e-05	-150.099	-7.21148	4
4.17646	2.34606	37.2417	23.8169	43201.6	3.31653e+06	5.07875	49.9394	1.16364e-05	8.4304e-06	-1111.79	25.2221	1
4.20319	2.11778	39.0539	23.9543	43696.5	3.48846e+06	5.19999	66.8699	1.72293e-05	0.00014902	-565.653	-12.9957	2
4.1842	2.47122	37.8847	23.2275	40313.5	3.22602e+06	5.30549	73.2642	3.02959e-05	0.000318235	-473.331	17.8027	2
4.18884	2.52499	38.5203	24.448	43892.3	3.6512e+06	3.35716	47.4728	8.24312e-06	1.17279e-05	-138.227	-19.8221	1
4.20196	2.16465	40.401	23.6924	38896.6	3.28721e+06	7.76944	85.1908	4.10218e-05	6.3106e-05	-2156.95	163.611	3
4.22292	2.69205	40.0942	24.1125	39561.1	3.48479e+06	4.51981	77.957	2.56125e-05	7.64623e-05	-127.695	-8.6943	3
4.19846	1.87116	40.2689	24.1383	45432.9	3.90436e+06	4.14765	52.9523	1.38541e-05	1.74064e-05	-360.278	-14.8769	1
4.19892	2.68991	39.3349	23.9803	39803.3	3.37311e+06	4.33478	74.291	2.58577e-05	4.79022e-05	-139.083	2.20588	3
4.1968	2.68379	41.4365	25.0136	35844.2	3.45351e+06	4.29444	79.8763	2.64813e-05	4.53257e-05	-127.928	-8.94216	4
4.19909	2.01335	39.5637	23.9381	43678.6	3.54867e+06	4.01078	52.9826	1.63744e-05	1.12199e-05	-309.898	14.8265	1
4.1968	2.68496	41.1557	24.8033	36109.9	3.42066e+06	4.30172	79.6489	2.64681e-05	4.59775e-05	-129.805	-7.15503	4
4.19606	2.04837	38.8381	23.5111	43327.1	3.38833e+06	4.98075	53.2591	6.7817e-06	1.15669e-05	-958.405	27.7019	1
4.18123	2.49409	39.3189	24.1145	38882	3.42921e+06	5.3466	77.1011	3.08037e-05	0.000147328	-454.696	14.2901	3
4.1815	2.46732	41.3667	24.8171	35364.8	3.53094e+06	5.18271	83.3911	3.42371e-05	4.5368e-05	-424.328	-2.65796	4
4.19691	2.69289	40.7642	24.3817	36247.8	3.35329e+06	4.29191	79.7911	2.63105e-05	4.50486e-05	-127.177	-7.30214	4
4.19373	2.28121	39.0461	24.4309	46617.1	3.83133e+06	3.67299	48.7433	5.29459e-06	8.48247e-06	-347.154	-12.6702	1
4.20191	2.19068	41.4823	24.4236	36924.6	3.33971e+06	8.16254	91.6974	3.99658e-05	5.75564e-05	-2389.82	249.806	4
4.18921	2.6401	38.1984	24.3205	43511.9	3.55684e+06	3.23327	46.9578	7.43811e-06	1.1819e-05	-96.3363	-17.4553	1
4.1976	2.64019	40.0673	23.8457	37741.5	3.3234e+06	4.40488	78.9978	2.7241e-05	5.15679e-05	-161.806	-0.347842	3
4.2043	2.07444	40.396	24.1007	40142.8	3.39071e+06	7.75115	80.5598	4.42306e-05	6.6997e-05	-2201.3	124.843	3
4.18547	2.45101	37.9343	23.325	40647.6	3.24257e+06	5.31669	72.3546	3.04792e-05	0.000338337	-487.537	16.8212	2
4.1995	2.14598	40.5904	23.9241	45846.1	4.01402e+06	4.03449	54.4889	1.06303e-05	1.76552e-05	-256.596	-23.4037	1
4.199	2.6505	38.828	23.8354	40824.2	3.35689e+06	4.37453	71.357	2.66113e-05	0.000134352	-158.604	-0.536232	2
4.18102	2.44826	41.141	24.4173	34768.9	3.42949e+06	5.19117	83.9638	3.54139e-05	5.12363e-05	-427.126	-5.20399	4
4.19779	2.68572	39.1068	24.4288	40129.9	3.38012e+06	4.35312	70.8937	2.55303e-05	0.000187632	-141.035	13.754	3
4.19924	2.69929	37.8013	23.2715	42264.7	3.31291e+06	4.24469	68.6591	2.5744e-05	0.000224797	-125.892	-23.56	2
4.17683	2.36641	38.8751	24.6504	45538.3	3.74599e+06	4.0237	49.2866	5.26791e-06	8.39478e-06	-520.001	2.87603	1
4.19828	2.02511	40.2756	24.319	45689	3.98092e+06	4.01424	52.718	1.2187e-05	1.67253e-05	-281.692	-19.9455	1
4.18259	2.37053	39.3816	24.0294	37784.2	3.39348e+06	5.4283	77.8685	3.47446e-05	6.2278e-05	-487.273	10.1544	3
4.201	2.02994	41.5404	24.5921	36011.3	3.28217e+06	8.27802	92.2942	4.61594e-05	6.09067e-05	-2475.53	275.498	4
4.20392	2.09628	41.3185	24.4357	38368.9	3.39398e+06	8.20875	87.2849	4.2992e-05	6.49644e-05	-2462.42	206.778	3
4.20286	2.17535	40.3107	23.8313	39523.4	3.33418e+06	7.73181	83.1988	4.06431e-05	6.06166e-05	-2149.61	143.57	3
4.19902	2.63094	38.9516	24.3616	41618.2	3.46377e+06	4.38466	68.544	2.6885e-05	0.000202916	-174.764	-5.05792	2
4.18489	2.37751	39.2214	23.9381	39360.8	3.41926e+06	5.50429	77.4316	3.34859e-05	0.00014697	-523.572	18.6796	3
4.19216	2.65982	40.6901	24.4421	36368.5	3.34748e+06	4.32412	79.1617	2.70155e-05	4.74824e-05	-144.139	0.0815402	4
4.18929	2.66003	41.167	25.1595	36040.6	3.43811e+06	4.31717	78.4861	2.66389e-05	5.85635e-05	-138.117	3.50671	4
4.17562	2.1207	38.8659	24.266	43510.3	3.52054e+06	5.26571	52.6701	6.09159e-06	9.16247e-06	-1316.39	28.6881	1
4.20081	2.12075	41.6274	24.3349	36441	3.31398e+06	8.21098	93.2158	4.32112e-05	5.87765e-05	-2421.42	263.075	4
4.1969	2.69707	40.7882	24.4719	35831.1	3.33663e+06	4.27013	79.4923	2.63071e-05	4.49261e-05	-120.427	-9.00949	4
4.18574	2.44189	38.207	23.9939	41194.9	3.38062e+06	5.29656	70.5576	3.07506e-05	0.000174017	-493.866	7.81605	2
4.20072	2.64522	38.2701	23.8265	41963.4	3.38238e+06	4.34274	67.9165	2.71883e-05	0.000230451	-158.371	-14.9988	2
4.18999	2.4343	37.2501	23.7403	44048.4	3.395e+06	4.25263	62.6603	1.53906e-05	0.000166597	-186.554	-29.3111	2
4.20249	2.079	40.2477	24.216	40805.6	3.41496e+06	7.65028	77.123	4.3593e-05	0.000130794	-2183.91	96.618	2
4.19615	2.07598	39.328	23.7137	42377	3.3689e+06	7.29352	71.5046	6.56129e-06	2.43642e-05	-2176.97	166.32	2
4.20167	2.18436	40.778	23.955	38250.5	3.32835e+06	7.7875	87.4099	4.06499e-05	7.6734e-05	-2142.39	180.019	3
4.19812	2.64303	40.0375	23.9862	38323.6	3.36588e+06	4.41155	78.0965	2.69977e-05	4.9033e-05	-162.031	2.25438	3
4.20146	2.01196	40.1294	24.2391	40106.3	3.33776e+06	7.80378	77.8662	4.62963e-05	0.000168099	-2250.04	133.106	3
4.19787	2.63385	40.2922	24.255	37751.8	3.38418e+06	4.41701	78.2266	2.71571e-05	4.69145e-05	-162.166	2.6561	4
4.19624	2.68321	41.2726	24.9329	36245.7	3.45645e+06	4.30288	79.5157	2.64085e-05	4.60051e-05	-130.551	-7.22363	4
4.19894	2.6657	39.5138	24.0371	39618.6	3.3873e+06	4.37711	74.9539	2.63806e-05	4.96817e-05	-152.586	3.3162	3
4.178	2.4263	38.8498	24.6661	44515.9	3.66207e+06	4.63295	50.9095	5.18001e-06	7.75991e-06	-872.553	16.4279	1
4.17745	2.41153	38.7702	24.4553	42965.6	3.50711e+06	5.48194	53.4879	1.1069e-05	8.92889e-06	-1454.56	37.9713	1
4.19937	2.02625	39.8881	24.303	45077.6	3.83586e+06	3.92812	51.9845	1.2041e-05	1.50806e-05	-267.47	-11.9593	1
4.19854	2.65936	39.4372	23.9692	39627.2	3.36949e+06	4.38318	74.8099	2.64528e-05	4.846e-05	-157.103	4.46483	3
4.19987	2.00844	41.6412	24.1997	36455.1	3.26786e+06	8.29212	92.7811	4.71463e-05	6.24333e-05	-2502.47	270.498	4
4.19878	2.63112	39.6875	24.0435	39284.4	3.37748e+06	4.43542	75.6946	2.71776e-05	4.78474e-05	-173.377	6.92817	3
4.19934	2.6399	39.5096	24.1249	39918.7	3.40756e+06	4.4174	74.1761	2.68668e-05	4.91092e-05	-167.932	4.41491	3
4.18216	2.36287	40.0217	23.3795	36516.7	3.3399e+06	5.37521	83.4246	3.61814e-05	8.69212e-05	-474.685	-2.39953	3
4.20133	2.19489	40.7507	23.5825	37826.2	3.26284e+06	7.784	89.4987	4.01521e-05	6.31123e-05	-2135.09	191.927	3
4.18297	2.47945	40.7522	24.3056	36506.5	3.50653e+06	5.24371	82.4664	3.277e-05	8.23143e-05	-425.083	-7.6858	4
4.19883	1.78962	40.1214	24.0627	44557.9	3.72767e+06	4.18534	52.7116	1.45995e-05	1.68788e-05	-413.519	-2.57868	1
4.18996	2.38447	40.4267	24.454	37134.4	3.49266e+06	5.42216	80.332	3.49983e-05	0.000165527	-470.706	10.0719	3
4.1969	1.84602	39.4542	23.9467	44352.2	3.59834e+06	4.11314	51.4334	1.43103e-05	1.69599e-05	-383.627	3.69562	1
4.18892	2.47245	38.5414	24.4313	44497.3	3.71493e+06	3.41712	47.411	8.67639e-06	1.25527e-05	-155.826	-22.0994	1
4.20267	2.13562	38.426	23.3059	43006.5	3.29026e+06	6.01194	68.1819	1.73799e-05	0.000166249	-1076.79	12.5711	2
4.2047	2.13779	40.2621	23.6178	38798.6	3.25643e+06	7.81217	84.7853	4.23288e-05	0.000164254	-2171.06	168.886	3
4.18977	2.58721	39.0334	24.6859	45947.9	4.00294e+06	3.29641	48.0029	7.82296e-06	1.28677e-05	-96.17	-33.0155	1
4.18596	2.46946	38.2925	23.9849	40455.2	3.34401e+06	5.36671	71.914	2.98703e-05	0.000218573	-503.409	23.2372	2
4.2012	2.14378	41.0528	23.9737	37275.9	3.27802e+06	8.18454	90.9707	4.18017e-05	5.78337e-05	-2415.88	238.076	4
4.18882	2.52095	38.7517	24.5144	45807.3	3.91115e+06	3.35978	47.7783	8.31042e-06	1.21517e-05	-120.55	-29.9644	1
4.19816	2.69579	40.3025	24.3045	37695.3	3.38506e+06	4.32452	78.1735	2.59815e-05	4.86187e-05	-133.009	-0.570073	3
4.18698	2.35514	39.2129	25.5879	41727.5	3.6314e+06	5.25839	66.1786	3.20596e-05	0.000363819	-553.454	15.1661	2
4.19797	2.17569	39.6762	24.1358	45838.8	3.93384e+06	3.78035	52.3307	1.06257e-05	1.45152e-05	-189.395	-24.6828	1
4.19805	2.62978	40.1166	24.2109	38165.5	3.38552e+06	4.43195	77.5768	2.73728e-05	5.74457e-05	-168.038	3.61361	3
4.20234	2.19286	40.3326	23.7703	39326.3	3.32169e+06	7.73212	84.0117	3.99698e-05	6.44556e-05	-2139.95	149.083	3
4.18805	2.66139	37.9985	23.7941	43294.5	3.46549e+06	3.21867	48.0996	7.27672e-06	1.26234e-05	-93.6048	-16.4113	1
4.19884	2.67436	39.4724	23.5043	38367.6	3.26846e+06	4.36052	77.7973	2.65456e-05	4.95748e-05	-145.974	0.0121111	3
4.19937	2.67427	39.1829	24.8333	41946.6	3.56299e+06	4.32524	67.1579	2.58692e-05	0.000214714	-149.271	-9.13254	2
4.18025	2.47971	40.0782	23.4837	36587.1	3.36498e+06	5.2399	83.1818	3.27242e-05	6.27526e-05	-427.787	-7.74354	3
4.17799	2.34236	38.7685	24.6277	44190.5	3.61021e+06	4.81414	51.1603	5.55359e-06	8.53219e-06	-979.533	21.8066	1
4.18244	2.37842	39.9686	23.8688	36898.9	3.38619e+06	5.36991	80.4092	3.55497e-05	0.000213636	-471.995	5.74426	3
4.20114	2.65001	41.3622	25.2122	36240.8	3.48529e+06	4.36547	78.782	2.70646e-05	4.44884e-05	-138.878	-3.37073	4
4.2032	2.05374	39.3122	23.7466	42366	3.38462e+06	6.90816	71.8439	1.73673e-05	9.86274e-05	-1761.9	32.5224	2
4.18734	2.69407	38.1658	24.2166	44306.2	3.63713e+06	3.20006	47.2718	6.85522e-06	1.2233e-05	-82.1392	-22.2428	1
4.23333	2.14427	41.0156	23.8506	39739.7	3.41195e+06	7.90313	84.6405	4.0725e-05	0.000140811	-2182.8	131.397	3
4.20284	2.0926	38.5823	23.0217	42449.9	3.23715e+06	6.71532	71.2396	1.75119e-05	0.000176747	-1608.15	27.362	2
4.20342	2.17735	40.3619	25.3823	42648.2	3.67201e+06	6.67262	69.0549	1.6963e-05	0.000135915	-1564.96	37.3107	2
4.17635	2.24799	38.7922	24.3803	43036.2	3.49302e+06	5.51116	53.3281	6.09673e-06	9.19424e-06	-1502.48	36.3168	1
4.18584	2.46913	38.7483	23.9762	39703.6	3.38145e+06	5.40344	75.0228	3.04054e-05	0.000151972	-484.087	21.1467	3
4.20149	2.02531	42.3325	24.7447	35872.1	3.37234e+06	8.27654	95.0738	4.65618e-05	5.79512e-05	-2471.25	282.393	4
4.18359	2.3903	39.4844	23.9868	37453.5	3.38924e+06	5.38981	78.5073	3.44939e-05	6.47207e-05	-472.108	6.06361	3
4.19918	2.69794	38.0746	23.7552	42681.3	3.40581e+06	4.25019	67.0105	2.57091e-05	0.000235518	-127.082	-24.4412	2
4.19626	1.90531	39.9587	24.3587	45265.4	3.83164e+06	4.09911	51.2022	1.29418e-05	1.64184e-05	-347.872	-9.29853	1
4.18846	2.59295	38.7623	24.6522	45604.9	3.90635e+06	3.26738	47.2544	7.82684e-06	1.28223e-05	-94.0144	-29.4161	1
4.18698	2.47262	37.397	24.1858	43272.8	3.38134e+06	4.76422	62.066	2.9463e-05	0.000382376	-402.895	-10.3984	2
4.19409	2.68443	38.5035	23.9927	42154.9	3.43544e+06	4.43561	68.2159	7.44581e-06	2.87098e-05	-383.118	112.053	2
4.18399	2.40667	39.7401	24.0621	38596.7	3.46223e+06	5.44326	79.5161	3.29661e-05	6.1588e-05	-488.172	13.0865	3
4.18309	2.38144	40.8172	24.2218	35335.8	3.42449e+06	5.27873	83.4712	3.69237e-05	5.34559e-05	-456.423	-2.46099	4
4.18121	2.44864	40.0245	23.8126	36788.8	3.38016e+06	5.30613	81.4793	3.31565e-05	0.000129209	-442.388	4.05454	3
4.20448	2.06743	38.6113	23.521	42187.8	3.272e+06	7.07939	69.8251	1.74608e-05	0.000169183	-1892.49	42.8471	2
4.20396	2.10316	40.6457	24.1679	38871.1	3.34867e+06	7.82877	83.7802	4.34395e-05	0.000173456	-2193.7	163.554	3
4.18745	2.61751	38.5142	24.566	44692.2	3.75319e+06	3.29721	47.149	7.27111e-06	1.19209e-05	-108.134	-23.2818	1
4.19792	2.65408	40.3201	24.206	37505	3.36462e+06	4.37977	78.7273	2.66166e-05	4.94027e-05	-151.009	1.77457	4
4.2026	2.17838	40.1885	23.7326	39683.8	3.31765e+06	7.71248	82.5475	4.01781e-05	6.30021e-05	-2147.07	137.538	3
4.19617	2.08632	41.217	24.069	37071.5	3.28659e+06	8.22228	91.2067	4.36458e-05	0.000127734	-2448.72	243.276	4
4.18339	2.45625	40.4634	24.1524	35851.3	3.40705e+06	5.234	82.5503	3.40487e-05	5.11501e-05	-429.362	3.35536	4
4.18878	2.49424	38.4788	24.3824	42981.6	3.52338e+06	3.38069	47.4577	8.52436e-06	1.18421e-05	-158.412	-12.5269	1
4.18638	2.39481	37.5868	23.4083	41190.3	3.25128e+06	5.33585	70.2601	3.1954e-05	0.000350759	-523.064	9.12476	2
4.1826	2.38235	39.472	23.9289	38707.4	3.40575e+06	5.47401	78.0796	3.37081e-05	0.000192607	-502.8	16.88	3
4.20653	2.18156	38.9597	23.5272	44286	3.51173e+06	4.66812	67.7655	4.08199e-05	0.000106003	-286.269	-37.0331	1
4.20324	2.0671	39.722	23.7383	41493.6	3.34073e+06	7.49691	74.6027	5.61012e-05	0.000109632	-2152.31	66.8918	2
4.17756	2.35129	39.4471	24.0548	37588.1	3.39466e+06	5.41503	77.9231	3.5444e-05	6.01342e-05	-494.898	9.27491	3
4.19679	2.13488	38.6801	23.5199	43620.8	3.40803e+06	4.61515	52.6016	6.50114e-06	1.08727e-05	-713.746	21.3926	1
4.19656	2.66411	40.9373	24.3549	35781.2	3.33673e+06	4.32521	80.5701	2.71242e-05	4.50918e-05	-137.706	-8.24475	4
4.18911	2.69462	38.2136	24.4631	43801.4	3.60317e+06	3.17862	46.6197	7.09661e-06	1.20264e-05	-76.3352	-18.7479	1
4.19731	2.69952	40.3145	24.229	37270.8	3.35625e+06	4.30159	78.6248	2.57691e-05	4.71562e-05	-128.062	-2.74004	4
4.20133	2.69018	39.4445	24.3288	40151.7	3.43657e+06	4.3402	73.0491	2.58266e-05	4.96063e-05	-137.365	2.24067	3
4.19799	2.69377	40.2472	24.2397	37825.1	3.38455e+06	4.32822	78.1086	2.60476e-05	4.40982e-05	-134.409	-1.53629	3
4.19827	1.92254	40.2931	24.2236	45466.7	3.9275e+06	4.11869	52.8328	1.32954e-05	1.74288e-05	-339.92	-15.5508	1
4.1769	2.18644	38.9863	24.515	45171.6	3.69768e+06	4.33218	49.9448	5.43877e-06	9.48279e-06	-697.885	7.12621	1
4.1976	2.63767	41.0603	24.7048	36494.7	3.42561e+06	4.38176	79.6703	2.7307e-05	4.5164e-05	-152.778	-2.31138	4
4.18305	2.48408	40.9977	24.2732	35912.6	3.50055e+06	5.21059	83.6544	3.32703e-05	5.14067e-05	-418.979	-14.181	4
4.19192	2.18093	41.0499	26.466	42596.8	3.85692e+06	6.67185	67.4386	1.59788e-05	0.000205592	-1575.71	43.6496	2
4.19958	2.66371	38.7493	24.0206	42148.8	3.46921e+06	4.30782	69.3186	2.6143e-05	0.000128677	-147.623	-21.1404	2
4.20101	2.12943	41.1003	24.0634	35698.6	3.19417e+06	8.20219	93.7183	4.24946e-05	5.88561e-05	-2407.01	277.454	4
4.20076	2.13099	41.0904	24.0835	35713.1	3.18922e+06	8.20257	93.442	4.26319e-05	5.71122e-05	-2408.82	278.437	4
4.18345	2.3939	39.1588	23.9494	38005	3.36775e+06	5.4277	77.0951	3.37676e-05	6.53119e-05	-481.983	13.2564	3
4.18204	2.46091	39.4998	23.847	37020.3	3.36031e+06	5.28259	79.011	3.29577e-05	5.72038e-05	-438.461	-0.16631	3
4.20162	2.1663	40.8563	24.0631	38300.6	3.34421e+06	7.79541	87.2013	4.10165e-05	8.71201e-05	-2153.19	180.282	3
4.17955	2.36925	41.3779	24.6602	35096.8	3.50302e+06	5.26103	84.0692	3.72667e-05	4.4368e-05	-463.757	-3.22856	4
4.20115	2.17017	41.7827	24.6098	36624.4	3.36998e+06	8.17738	92.8049	4.09533e-05	5.74033e-05	-2396.22	257.651	4
4.18039	2.3928	40.5872	23.9808	36074.1	3.42894e+06	5.30444	82.7776	3.56722e-05	0.000119489	-456.552	-7.14076	4
4.18243	2.42041	39.036	24.4238	38422.6	3.37198e+06	5.43687	74.071	3.23627e-05	0.000398835	-479.353	30.1168	3
4.18364	2.41376	40.3934	24.1078	35952.9	3.40104e+06	5.28034	82.5074	3.49223e-05	5.12917e-05	-446.371	5.55203	4
