# Supplementary material for: Enhanced detection of accounting fraud using a CNN-LSTM-Attention model optimized by Sparrow search
Source: PeerJ journal article supplement (doi:10.7717/peerj-cs.2532), 2024-11-26
Supplement: instructions.pdf [file instructions.pdf]

# Instructions for Downloading the Dataset

*Please be aware that the content on the CSMAR database website is presented in Chinese.*

## Step 1:

Visit the CSMAR database website: <https://data.csmar.com/>

Create an account, then log in using your credentials.

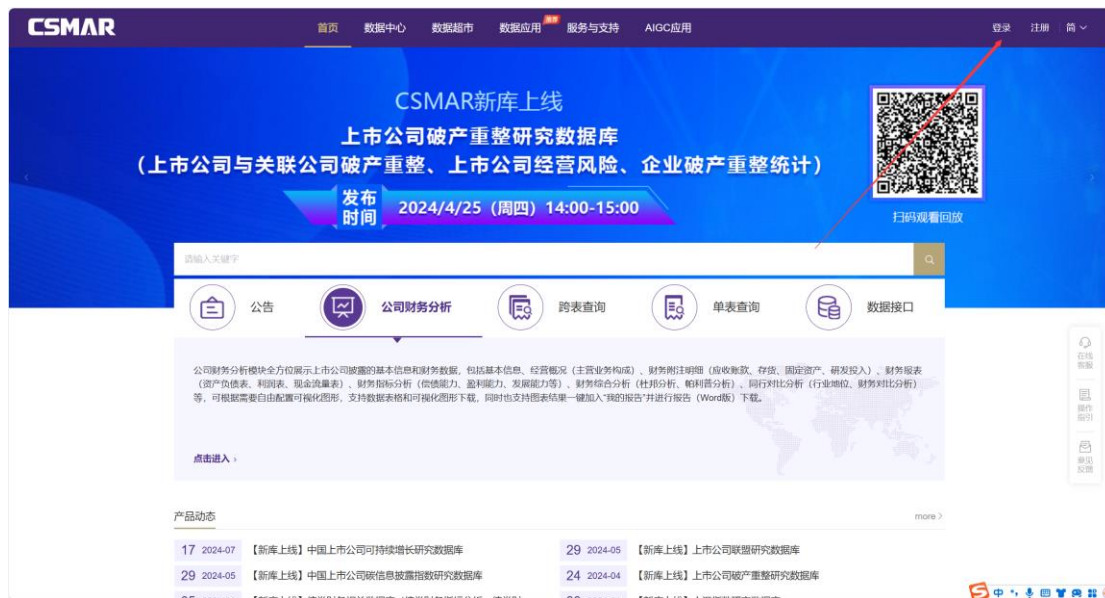

## Step 2:

Once logged in, your account name will appear. Then, click on "Data Center."

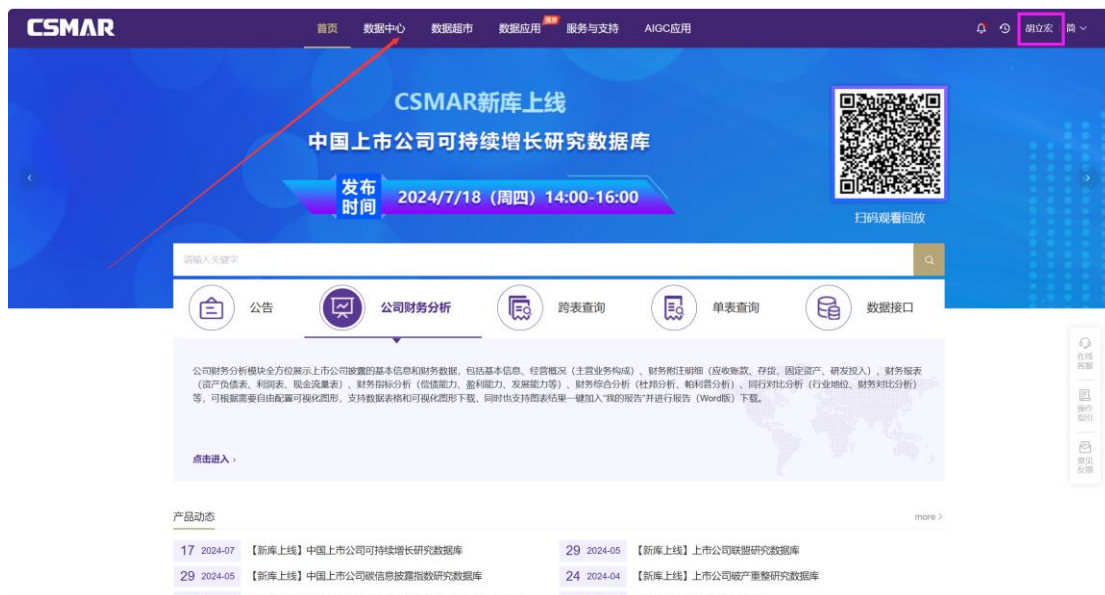

## Step 3:

Filter the company data and compute statistics for the financial indicators. Select data for the desired year and include the necessary indicators.



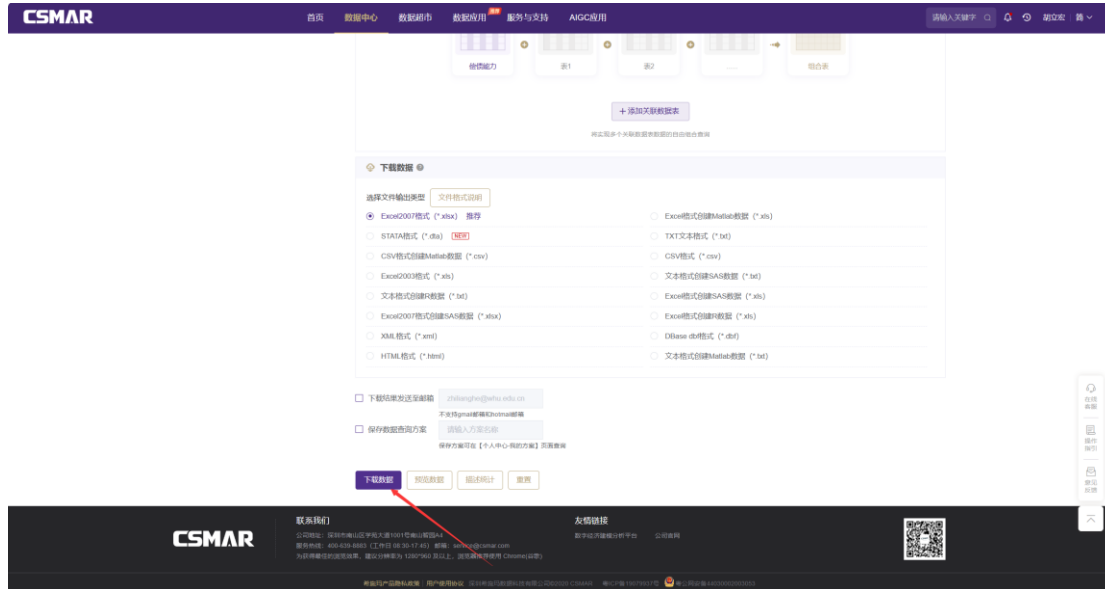

For example, using the "Operating Leverage" variable.

The screenshot shows an Excel spreadsheet with financial data. The 'Operating Leverage' variable is highlighted in the 'OL' column. A red arrow points to the 'Operating Leverage' variable in the 'OL' column.

|    | AQ                | AR                | AS              | AT                | AU                  | AV                 | AW                 | AX                 | AY                 | AZ                 | BA                 | BB                  |
|----|-------------------|-------------------|-----------------|-------------------|---------------------|--------------------|--------------------|--------------------|--------------------|--------------------|--------------------|---------------------|
|    | CTR1              | CTR2              | ITR             | CAP               | CMIR                | RCA                | FL                 | OL                 | CL                 | earnings per share | earnings per share | Annual stock return |
| 1  | preprehensive Tax | preprehensive Tax | Income Tax Rate | Capital Intensity | spital Appreciation | Rital Accumulation | financial Leverage | Operating Leverage | preprehensive Leve | arnings Per Share  | Earnings Per Shar  | Stock Return        |
| 2  | 0.155810028       | 0.407867104       | 0.073552854     |                   |                     |                    |                    |                    |                    |                    |                    | -0.047441           |
| 3  | 0.197521657       | 0.74860698        | 0.280156732     |                   | 0.765511274         | -0.234488741       |                    |                    |                    |                    |                    | -0.156336           |
| 4  | 0.161451757       | 0.780461371       | 0.320988715     |                   | 1.038689494         | 0.038689468        |                    |                    |                    |                    |                    | -0.135145           |
| 5  | 0.092617683       | 0.818727672       | 0.105667248     |                   | 1.052298784         | 0.052298728        |                    |                    |                    |                    |                    | -0.175335           |
| 6  | 0.136753529       | 1.247507215       | 0.410660138     |                   | 1.18147862          | 0.181478679        |                    |                    |                    |                    |                    | -0.225617           |
| 7  | 0.154420212       | 1.102086544       | 0.44923529      |                   | 1.076500654         | 0.076500639        |                    |                    |                    |                    |                    | -0.068285           |
| 8  | 0.183398247       | 0.624253869       | 0.346757501     |                   | 1.283408095         | 0.28340835         |                    |                    |                    | 0.67               | 0.67               | 1.356678            |
| 9  | 0.1891049         | 0.515984893       | 0.297438741     |                   | 2.008824825         | 1.008824944        |                    |                    |                    | 1.27               | 1.22               | 1.935114            |
| 10 | 0.098076932       | 1.678304195       | 0.225298986     |                   | 1.261011124         | 0.261011124        |                    |                    |                    | 0.2                | 0.2                | -0.680418           |
| 11 | 0.155936986       | 0.360056311       | 0.187351763     |                   | 1.24808681          | 0.248086765        |                    |                    |                    | 1.62               | 1.62               | 1.57611             |
| 12 | 0.17303434        | 0.379943997       | 0.214328647     |                   | 1.62179625          | 0.62179625         |                    |                    |                    | 1.91               | 1.91               | -0.352072           |
| 13 | 0.184731379       | 0.40530616        | 0.216254979     |                   | 2.27066803          | 1.270668149        |                    |                    |                    | 2.47               | 2.47               | -0.012666           |
| 14 | 0.191515267       | 0.424600333       | 0.230195388     |                   | 1.124941826         | 0.124941871        | 1                  | 1.071584105        | 1.071584105        | 2.62               | 2.62               | 0.035233            |
| 15 | 0.17300269        | 0.44281438        | 0.239970058     |                   | 1.321728945         | 0.321729004        | 1                  | 1.069960117        | 1.069960117        | 1.86               | 1.86               | 0.235097            |
| 16 | 0.168098867       | 0.453309923       | 0.24402535      |                   | 1.16834259          | 0.168342531        | 1                  | 1.06073916         | 1.06073916         | 1.73               | 1.73               | 0.57298             |
| 17 | 0.147262827       | 0.473271847       | 0.242009207     |                   | 1.2330462           | 0.23304575         | 1                  | 1.061395049        | 1.061395049        | 1.56               | 1.56               | -0.083704           |
| 18 | 0.103250459       | 0.360146999       | 0.245064303     |                   | 1.251832843         | 0.251832813        |                    |                    |                    | 1.32               | 1.32               | -0.075692           |
| 19 | 0.076190293       | 0.264946789       | 0.231057465     |                   | 1.098347425         | 0.09834744         |                    |                    |                    | 1.3                | 1.3                | 0.482743            |
| 20 | 0.080612361       | 0.265644878       | 0.229995966     |                   | 1.081007361         | 0.081007324        |                    |                    |                    | 1.39               | 1.39               | -0.283936           |
| 21 | 0.073611744       | 0.257588297       | 0.221992269     |                   | 1.303867698         | 0.303867668        |                    |                    |                    | 1.54               | 1.45               | 0.772751            |
| 22 | 0.06528113        | 0.254421294       | 0.212929204     |                   | 1.163421035         | 0.16342102         |                    |                    |                    | 1.4                | 1.4                | 0.195293            |
| 23 | 0.072878055       | 0.243837044       | 0.208003655     |                   | 1.086004734         | 0.086004764        |                    |                    |                    | 1.73               | 1.73               | -0.141304           |
| 24 | 0.083904058       | 0.235166714       | 0.205002353     |                   | 1.099208951         | 0.099208996        |                    |                    |                    | 2.2                | 2.2                | -0.187244           |
| 25 | 0.053796563       | 0.527133703       | 0.19413735      | 1.48592484        |                     |                    | 1.003635049        |                    |                    |                    |                    | 0.555746            |
| 26 | 0.067203097       | 0.5965783         | 0.238809047     | 1.455177903       | 1.054098606         | 0.054098628        | 0.993467033        |                    |                    |                    |                    | -0.033811           |
| 27 | 0.073780291       | 0.649019897       | 0.234538868     | 1.796059608       | 1.096087217         | 0.096087232        | 0.989376187        |                    |                    |                    |                    | -0.265477           |
| 28 | 0.096163479       | 0.7390185         | 0.318505198     | 1.65531981        | 1.389323711         | 0.389323652        | 0.999036431        |                    |                    |                    |                    | 0.375402            |
| 29 | 0.102177113       | 0.621595562       | 0.275860876     | 2.026081085       | 1.324335694         | 0.324335665        | 0.996631292        |                    |                    |                    |                    | 0.214562            |
| 30 | 0.112143129       | 0.599187195       | 0.274648815     | 2.082839489       | 1.361137986         | 0.361138016        | 1.008196235        |                    |                    |                    |                    | 0.267021            |
| 31 | 0.149128377       | 0.783647954       | 0.320509915     | 2.717803001       | 1.98176825          | 0.98176831         | 1.041263342        |                    |                    |                    |                    | 2.671332            |
| 32 | 0.181269124       | 0.842738807       | 0.304138273     | 2.817450523       | 1.994562507         | 0.994562566        | 1.047045112        |                    |                    | 0.73               | 0.73               | 1.832039            |

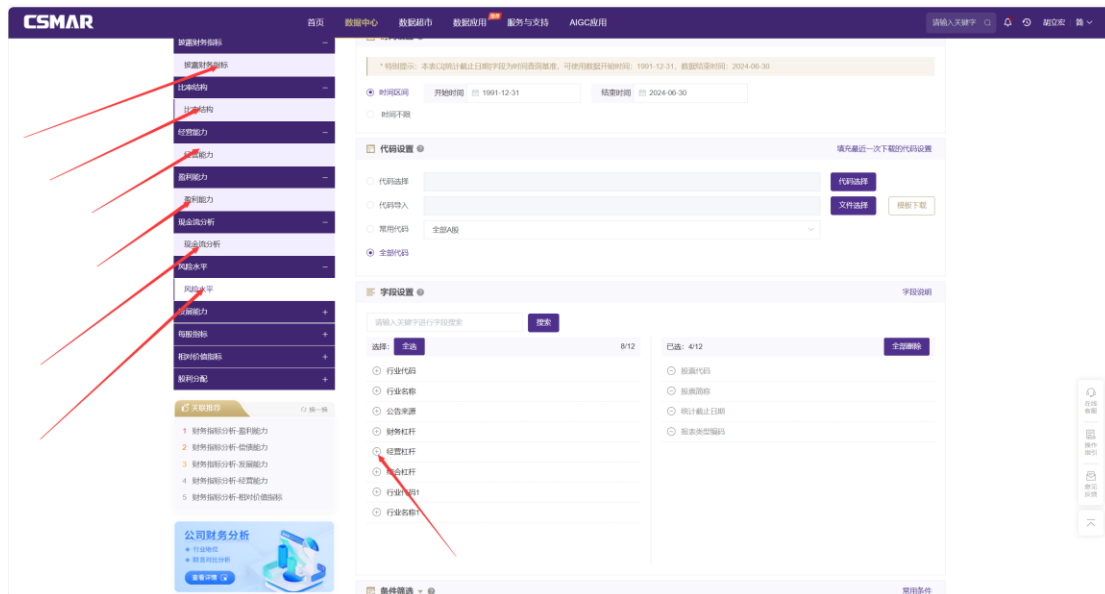

Click "Add," then export the data to an Excel file for filtering. Remove any irrelevant information.

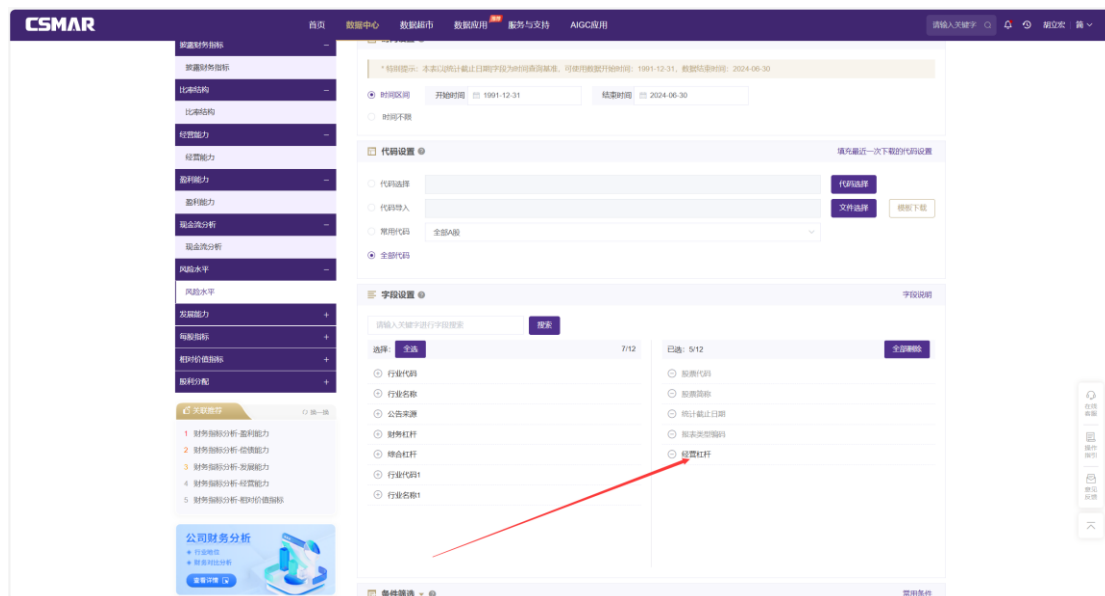

The subsequent variables follow the same repeated process. For variables with missing values, use MATLAB code to automatically remove them in batches.
