# Supplementary material for: Enhanced detection of accounting fraud using a CNN-LSTM-Attention model optimized by Sparrow search
Source: PeerJ Comput Sci. 2024 Nov 26;10:e2532. doi: 10.7717/peerj-cs.2532 (PMC11623018; doi:10.7717/peerj-cs.2532)
Supplement: Supplemental Information 5 [file peerj-cs-10-2532-s005.xlsx]

## Sheet: Sheet1
id	A unique identifier for each entry, usually a number representing the specific company or stock
Symbol	The stock symbol or ticker used to represent the company on the stock exchange
year	The year of the data being examined, such as financial information or stock performance
ShortName	The abbreviated or short name of the company
IndustryName	The name of the industry to which the company belongs
Industry1	A broader classification of the industry in which the company operates
Industry2	A more specific or secondary classification of the industry
ST or PT This Year	Indicates if the stock was labeled as "Special Treatment (ST)" or "Particularly Treated (PT)" in the current year, usually due to financial difficulties or regulatory issues
ST or PT During Sample Period	Whether the stock was labeled as ST or PT during the sample period analyzed
Delisted During Sample Period	Indicates whether the stock was delisted from the stock exchange during the sample period
Financial Industry	A binary indicator (1/0) of whether the company operates within the financial industry
Manufacturing Industry	A binary indicator (1/0) of whether the company operates within the manufacturing industry
Listed on Shanghai	A binary indicator (1/0) of whether the stock is listed on the Shanghai Stock Exchange
Listed in Beijing	A binary indicator (1/0) of whether the stock is listed on the Beijing Stock Exchange
Insolvency (Liabilities Exceed Assets)	Indicates whether the company is insolvent, meaning its liabilities exceed its assets
Market Type	The type of market in which the stock is traded, such as main board, SME board, or ChiNext
Listed This Year	Indicates if the company was newly listed in the current year
Pre-IPO Status	The company’s status prior to its initial public offering (IPO)
SOE Based on Ultimate Controller Nature	Whether the company is considered a state-owned enterprise (SOE) based on the nature of its ultimate controlling entity
SOE Based on Equity Nature	Whether the company is classified as an SOE based on its equity structure
Size	The size of the company, usually based on factors like total assets or market capitalization
Lev	Leverage ratio, a measure of a company's debt relative to its equity
EM1	First measure of earnings management, indicating how the company manipulates earnings
EM2	Second measure of earnings management
DER	Debt-to-equity ratio, a measure of the company’s financial leverage
DLCR	Debt-to-long-term capital ratio, indicating the proportion of debt relative to long-term capital
ROA1	Return on Assets (first measure), indicating how efficiently a company uses its assets to generate profit
ROA2	Return on Assets (second measure)
ROE	Return on Equity, a measure of the company’s profitability relative to shareholders' equity
GrossProfit	The gross profit of the company, calculated as revenue minus the cost of goods sold
NetProfit	The company’s net profit after all expenses have been deducted
Liquid	A measure of liquidity, indicating how easily the company can meet short-term obligations
Quick	Quick ratio, a measure of liquidity that excludes inventory from current assets
Cashflow	The amount of cash generated by the company’s operations
REC	Accounts receivable, representing money owed to the company by customers
INV	Inventory, the value of goods that the company has in stock
FIXED	Fixed assets, such as property, plants, and equipment
Intangible	Intangible assets, such as patents, trademarks, and goodwill
Tangible	Tangible assets, physical items that the company owns
Growth	The company’s growth rate, often measured in terms of revenue or profit growth
AssetGrowth	The growth rate of the company’s total assets over time
NetProfitGrowth	The growth rate of the company’s net profit over time
CTR1	First measure of cost-to-revenue ratio
CTR2	Second measure of cost-to-revenue ratio
ITR	Inventory turnover ratio, a measure of how efficiently inventory is managed
CAP	Capital expenditure, the funds used by the company to acquire, upgrade, or maintain physical assets
CMIR	Cash-to-market investment ratio
RCA	Return on capital employed, a measure of how efficiently capital is used
FL	Financial leverage, indicating how much the company relies on debt financing
OL	Operating leverage, showing how fixed costs contribute to the company’s operating income
CL	Current liabilities, debts or obligations due within one year
Basic earnings per share	The company’s net earnings divided by the number of outstanding shares
Diluted earnings per share	Earnings per share calculated by including convertible securities, options, and other dilutive potential shares
Annual stock return 1	First measure of the company’s stock return over the year
Annual individual stock return 2	Second measure of the individual stock’s annual return
Invest1	First measure of the company’s investments
Invest2	Second measure of investments
Invest3	Third measure of investments
Invest4	Fourth measure of investments
Loss	Indicates whether the company reported a loss during the year
Board	Information regarding the company’s board of directors
Indep	Indicates the number of independent directors on the company’s board
Dual	Whether the roles of CEO and chairperson of the board are held by the same individual
Top1	Ownership percentage held by the largest shareholder
Top3	Ownership percentage held by the top three shareholders
Top5	Ownership percentage held by the top five shareholders
Top10	Ownership percentage held by the top ten shareholders
Balance1	First balance sheet item
Balance2	Second balance sheet item
Balance3	Third balance sheet item
Herfindahl3	Herfindahl index for the top three shareholders, a measure of ownership concentration
Herfindahl5	Herfindahl index for the top five shareholders
Herfindahl10	Herfindahl index for the top ten shareholders
Seperate	Indicates whether ownership is separated between different parties
BM	Book-to-market ratio, a measure of a company’s valuation relative to its book value
PB	Price-to-book ratio, a measure of how the market values the company relative to its book value
TobinQ	A ratio comparing a company’s market value to the replacement cost of its assets
ListAge	The number of years the company has been listed on the stock exchange
FirmAge	The number of years since the company was established
Ofee	Audit office fees paid by the company
Mfee	Management fees paid by the company
ATO	Asset turnover, a measure of how efficiently a company uses its assets to generate revenue
Occupy	Indicates the proportion of a company’s assets occupied or used
Big4	Indicates whether the company’s financials were audited by one of the "Big Four" accounting firms
Opinion	The audit opinion given by the company’s auditor
AuditFee	The fee paid for the audit services
Employee	The total number of employees working for the company
TMTAge	The average age of the top management team
INST	Indicates the proportion of institutional ownership in the company
Mshare	Indicates management’s shareholding percentage in the company
Bank	Indicates whether the company has relationships with banks or financial institutions
FinInst	Indicates whether the company is associated with financial institutions
Female	The percentage of female employees or board members in the company
FinBack	Indicates whether the company has financial backing
TMTPay1	First measure of top management team pay
TMTPay2	Second measure of top management team pay
Total Number of Shareholders	The total number of shareholders in the company
Whether the top 10 shareholders are related	Indicates if the top 10 shareholders are connected or have relationships
ChairHold	The percentage of shares held by the chairperson of the board
ChairHoldR	The ratio of shares held by the chairperson relative to other executives
OverseaBack	Indicates whether the company has international investors or backing
CEOHold	The percentage of shares held by the CEO
CEOHoldR	The ratio of shares held by the CEO relative to other executives
SA	Indicates if the company has social accountability certifications
WW	Indicates workplace welfare policies or programs
FC	Indicates whether the company has a financial crisis indicator
KZ	KZ index, which measures the company's dependence on external finance
Province	The province in which the company is located
City	The city where the company is headquartered
Lng	Longitude of the company’s location
Lat	Latitude of the company’s location
Listedyear	The year the company was listed on the stock exchange
Establishyear	The year the company was founded
Delistedyear	The year the company was delisted, if applicable
East	Indicates if the company is located in eastern China
West	Indicates if the company is located in western China
Mid	Indicates if the company is located in central China
HighTech_1	Indicates if the company is in a high-tech industry, first classification
HighTech_2	Second high-tech industry classification
HighTech_3	Third high-tech industry classification
HighTech_4	Fourth high-tech industry classification
HighTech_5	Fifth high-tech industry classification
Pollute_1	Indicates if the company operates in a polluting industry, first classification
Pollute_2	Second polluting industry classification
Pollute_3	Third polluting industry classification
labor-intensive	Indicates if the company operates in a labor-intensive industry
technology-intensive	Indicates if the company operates in a technology-intensive industry
asset-intensive	Indicates if the company operates in an asset-intensive industry
