# Supplementary material for: Enhanced detection of accounting fraud using a CNN-LSTM-Attention model optimized by Sparrow search
Source: PeerJ Comput Sci. 2024 Nov 26;10:e2532. doi: 10.7717/peerj-cs.2532 (PMC11623018; doi:10.7717/peerj-cs.2532)
Supplement: Supplemental Information 6 [file peerj-cs-10-2532-s006.xlsx]

## Sheet: Sheet1
fraud	Fraud stock abbreviation	Fraud year	Total assets fraud	Industry Code	Is it fraud?	year	Matching stock symbols	Stock Name	Total assets enterprise size	Industry Name	gap	Absolute value of the gap
000002	VankeA	2015	6.11296e+11	K70	1	2014	000024	China Merchants Real Estate	1.51692e+11	Real Estate	-459603214336	459603214336
000002	VankeA	2020	1.86918e+12	K70	1	2019	600048	Poly Development	1.03321e+12	Real Estate	-835968368640	835968368640
000004	National Agricultural Technology	2018	3.51177e+08	I65	1	2017	300047	Tianyuan Dico	4.09501e+09	Software and information technology services	3743836928	3743836928
000004	National Agricultural Technology	2019	1.49449e+09	I65	1	2018	300532	Today International	1.51132e+09	Software and information technology services	16825150	16825150
000010	Shenzhen Huaxin	2021	4.58749e+09	E48	1	2020	002116	China Haicheng	4.52065e+09	Civil Engineering and Construction	-66839148	66839148
000040	Dongxu Blue Sky	2015	6.76891e+09	D44	1	2014	000600	Jiantou Energy	2.52663e+10	Electricity, heat production and supply industry	18497406976	18497406976
000048	*STKanda	2016	1.95974e+09	C13	1	2015	002548	Jin Xinnong	2.44338e+09	Agricultural and sideline food processing industry	483639072	483639072
000150	Yihua Health	2019	5.95188e+09	Q83	1	2018	600763	Tongce Medical	2.13269e+09	health	-3819183872	3819183872
000150	Yihua Health	2020	5.0933e+09	Q83	1	2019	002219	New Milestone	4.90989e+09	health	-183407360	183407360
000166	Shenwan Hongyuan	2019	3.88537e+11	J67	1	2018	000750	Sealand Securities	6.31671e+10	Capital Market Services	-325370150912	325370150912
000333	Midea Group	2016	170600711000	C38	1	2015	600152	Veken Technology	1.38845e+09	Electrical machinery and equipment manufacturing industry	-169212264448	169212264448
000403	Revitalize Biochemistry	2016	1.2796e+09	C27	1	2015	603168	Sharps	1.27499e+09	Pharmaceutical Manufacturing	-4.60731e+06	4.60731e+06
000408	Zangge Holdings	2015	4.63903e+08	C26	1	2014	600714	Jinrui Mining	1.29125e+09	Chemical raw materials and chemical products manufacturing industry	827344448	827344448
000504	Nanhua Biotechnology	2021	6.59246e+08	M75	1	2020	832317	Guandian Defense	9.11245e+08	Technology promotion and application services	251999760	251999760
000510	Golden Road Group	2015	1.54253e+09	C26	1	2014	300225	Jinlitai	1.02395e+09	Chemical raw materials and chemical products manufacturing industry	-518576256	518576256
000518	Sihuan Biotechnology	2020	8.23708e+08	C27	1	2019	600572	Connbe	9.86034e+09	Pharmaceutical Manufacturing	9036634112	9036634112
000518	Sihuan Biotechnology	2021	7.99312e+08	C27	1	2020	600299	Andy Su	20617633075	Pharmaceutical Manufacturing	19818321920	19818321920
000523	Guangzhou Langqi	2021	2.70725e+09	C26	1	2020	002802	Honghui New Materials	6.86733e+08	Chemical raw materials and chemical products manufacturing industry	-2020516608	2020516608
000541	Foshan Lighting	2015	6.0483e+09	C38	1	2014	601012	LONGi Green Energy	6.44934e+09	Electrical machinery and equipment manufacturing industry	401041408	401041408
000541	Foshan Lighting	2016	6.10017e+09	C38	1	2015	002692	STremote	3.22431e+09	Electrical machinery and equipment manufacturing industry	-2875858944	2875858944
000568	Luzhou Laojiao	2020	3.50092e+10	C15	1	2019	600600	Tsingtao Beer	37312383547	Wine, beverage and refined tea manufacturing industry	2303179776	2303179776
000571	*STContinents	2018	4.2282e+09	S90	1	2017	000551	Chuangyuan Technology	4.21749e+09	comprehensive	-10712061	10712061
000571	*STContinents	2019	3.45272e+09	S90	1	2018	000609	Zhongdi Investment	2.96556e+09	comprehensive	-487157472	487157472
000572	Haima Automobile	2021	8.20727e+09	C36	1	2020	603596	Bethel	4.67236e+09	Automotive Manufacturing	-3534911744	3534911744
000584	Harbin Institute of Technology Intelligent	2015	2954524116	C35	1	2014	002691	Jikai Shares	9.25901e+08	Special equipment manufacturing industry	-2028623616	2028623616
000603	Shengda Mining	2018	3.70893e+09	B09	1	2017	600338	Mount Everest, Tibet	3.2353e+09	Non-ferrous metal mining and dressing industry	-473633600	473633600
000608	Sunshine Holdings	2015	10252324000	K70	1	2014	000620	*STNew Union	2.46957e+10	Real Estate	14443378688	14443378688
000632	Miki Group	2015	7.15301e+09	F51	1	2014	000025	TeliA	8.06325e+08	Wholesale Industry	-6346688512	6346688512
000635	Yinglite	2018	3.13596e+09	C26	1	2017	600352	Zhejiang Longsheng	4.63528e+10	Chemical raw materials and chemical products manufacturing industry	43216846848	43216846848
000636	Fenghua Hi-Tech	2019	7.00151e+09	C39	1	2018	600171	Shanghai Belling	2.70777e+09	Computer, communication and other electronic equipment manufacturing	-4293731584	4293731584
000636	Fenghua Hi-Tech	2020	8.77893e+09	C39	1	2019	600877	Electronics Chip	5.1803e+08	Computer, communication and other electronic equipment manufacturing	-8260897280	8260897280
000636	Fenghua Hi-Tech	2021	1.08276e+10	C39	1	2020	300211	Yitong Technology	5.06652e+08	Computer, communication and other electronic equipment manufacturing	-10320930816	10320930816
000659	Zhuhai Zhongfu	2015	3.17525e+09	C29	1	2014	000859	Guofeng New Materials	1.91663e+09	Rubber and plastic products industry	-1258615040	1258615040
000663	*STYonglin	2020	1.51886e+09	C21	1	2019	300729	Lechuang Holdings	1.50312e+09	Furniture Manufacturing	-15731943	15731943
000663	Yongan Forestry	2021	1.36555e+09	C21	1	2020	300749	Dinggu Jichuang	1.46319e+09	Furniture Manufacturing	97641392	97641392
000668	Rongfeng Holdings	2015	1.44123e+09	K70	1	2014	000615	*STBeautiful Valley	1.49161e+09	Real Estate	50378356	50378356
000670	*STInfront	2016	7.74951e+08	C39	1	2015	600707	Rainbow Shares	6.15171e+09	Computer, communication and other electronic equipment manufacturing	5376761344	5376761344
000670	*STInfront	2017	4.46865e+08	C39	1	2016	000636	Fenghua Hi-Tech	6.64247e+09	Computer, communication and other electronic equipment manufacturing	6195607552	6195607552
000670	*STInfront	2020	1.46842e+09	C39	1	2019	002313	*STSunsea	6.9559e+09	Computer, communication and other electronic equipment manufacturing	5487482880	5487482880
000672	Shangfeng Cement	2018	7.00243e+09	C30	1	2017	600819	Yaopi Glass	7.01546e+09	Non-metallic mineral products industry	13025971	13025971
000677	Hengtian Hailong	2017	8.4475e+08	C28	1	2016	600346	Hengli Petrochemical	1.96988e+10	Chemical fiber manufacturing industry	18854004736	18854004736
000681	Visual China	2019	4.11718e+09	R87	1	2018	002699	*STMosaic	4.12369e+09	Culture and Arts Industry	6.51435e+06	6.51435e+06
000686	Northeast Securities	2018	6.50229e+10	J67	1	2017	000750	Sealand Securities	6.60092e+10	Capital Market Services	986321472	986321472
000691	Asia Pacific Industry	2016	3.41579e+08	C26	1	2015	300067	Anochi	1.37248e+09	Chemical raw materials and chemical products manufacturing industry	1030898240	1030898240
000691	Asia Pacific Industry	2017	2.52988e+08	C26	1	2016	300576	Rongda Photosensitive	4.83054e+08	Chemical raw materials and chemical products manufacturing industry	230066448	230066448
000739	Propharma	2015	5.39494e+09	C27	1	2014	000423	Dong'e Ejiao	7.45993e+09	Pharmaceutical Manufacturing	2064986368	2064986368
000750	Sealand Securities	2019	6.63081e+10	J67	1	2018	601108	Caitong Securities	5.86948e+10	Capital Market Services	-7613330944	7613330944
000760	*STStai	2020	5.25436e+08	C36	1	2019	002213	Dawei Shares	4.62557e+08	Automotive Manufacturing	-62879108	62879108
000766	Tonghua Golden Horse	2019	4.69805e+09	C27	1	2018	600488	Jinyao Pharmaceutical	4.80047e+09	Pharmaceutical Manufacturing	102422808	102422808
000782	Meida shares	2015	2.29742e+09	C28	1	2014	002172	Aoyang Health	2.39184e+09	Chemical fiber manufacturing industry	94428512	94428512
000782	Meida shares	2016	2.54445e+09	C28	1	2015	002254	Taihe New Materials	2.55772e+09	Chemical fiber manufacturing industry	13267490	13267490
000792	Salt Lake Shares	2021	2.52674e+10	C26	1	2020	000990	Chengzhi Shares	2.44124e+10	Chemical raw materials and chemical products manufacturing industry	-854970176	854970176
000798	Middle water fishery	2017	1.02682e+09	A04	1	2016	200992	ZhongluB	8.3524e+08	Fisheries	-191582976	191582976
000799	Jiugui Liquor	2016	2.3608e+09	C15	1	2015	600300	Weiwei Shares	8.03088e+09	Wine, beverage and refined tea manufacturing industry	5670081536	5670081536
000800	FAW Car	2016	1.90489e+10	C36	1	2015	002448	Zhongyuan Internal Parts	2.59543e+09	Automotive Manufacturing	-16453441536	16453441536
000802	Beijing Culture	2020	4.5391e+09	R86	1	2019	600052	Eastward Era	4.12931e+09	Radio, television, film and video recording production industry	-409791328	409791328
000802	Beijing Culture	2021	3.75e+09	R86	1	2020	300291	Baina Qiancheng	3.85692e+09	Radio, television, film and video recording production industry	106921696	106921696
000807	Yunnan Aluminum Co., Ltd.	2019	3.95795e+10	C32	1	2018	601212	Silver Color	4.56969e+10	Non-ferrous metal smelting and rolling processing industry	6117422592	6117422592
000835	Great Wall Animation	2019	5.04478e+08	I64	1	2018	600633	Zhejiang Digital Culture	1.00211e+10	Internet and related services	9516636160	9516636160
000835	*STLong Movement	2020	4.4704e+08	I64	1	2019	600358	China Travel United	5.58716e+08	Internet and related services	111676224	111676224
000839	CITIC Guoan	2021	9.97941e+09	I63	1	2020	600936	Guangxi Radio and Television	1.04211e+10	Telecommunications, broadcasting and satellite transmission services	441723072	441723072
000858	Wuliangye	2015	5.25466e+10	C15	1	2014	600519	Kweichow Moutai	6.58732e+10	Wine, beverage and refined tea manufacturing industry	13326530560	13326530560
000861	Haiyin Holdings	2019	1.10161e+10	L72	1	2018	002344	Haining Leather City	1.103e+10	Business Services	13889030	13889030
000861	Haiyin Holdings	2020	1.0375e+10	L72	1	2019	603117	STWan Lin	6.175e+09	Business Services	-4199966464	4199966464
000912	Lutianhua	2016	7.66463e+09	C26	1	2015	002584	Xilong Science	2.39135e+09	Chemical raw materials and chemical products manufacturing industry	-5273282560	5273282560
000922	Jiadian shares	2017	2.7484e+09	C38	1	2016	300217	Oriental Electric Heating	2.73715e+09	Electrical machinery and equipment manufacturing industry	-11250816	11250816
000922	Jiadian shares	2018	3.23339e+09	C38	1	2017	002606	Dalian Insulators	1.47351e+09	Electrical machinery and equipment manufacturing industry	-1759879424	1759879424
000928	Sinosteel International	2017	1.35477e+10	E48	1	2016	002431	Palm shares	1.36562e+10	Civil Engineering and Construction	108451104	108451104
000967	Yingfeng Environment	2015	5.45759e+09	N77	1	2014	300197	Energy-saving hero	5.06422e+09	Ecological protection and environmental governance industry	-393362272	393362272
000972	STZhongji	2015	2.62983e+09	C13	1	2014	600191	Huazi Industry	2.64923e+09	Agricultural and sideline food processing industry	19391470	19391470
000972	STZhongji	2016	2.41264e+09	C13	1	2015	002604	Dragon Force Retreat	2.69686e+09	Agricultural and sideline food processing industry	284223296	284223296
000982	*STMedium fleece	2017	1.21563e+10	C17	1	2016	601339	Blum Oriental	1.15396e+10	Textile Industry	-616748992	616748992
000982	Zhongyin Wool Industry	2021	1.34322e+09	C17	1	2020	000955	Xinlong Holdings	1.36422e+09	Textile Industry	21000998	21000998
000995	*STRoyal Terrace	2016	3.53553e+08	C15	1	2015	000729	Yanjing Beer	1.82428e+10	Wine, beverage and refined tea manufacturing industry	17889224704	17889224704
000995	*STRoyal Terrace	2017	2.82461e+08	C15	1	2016	000752	*STWest	1.40108e+09	Wine, beverage and refined tea manufacturing industry	1118617088	1118617088
000995	*STRoyal Terrace	2018	2.58745e+08	C15	1	2017	600696	Rock Shares	8.1305e+08	Wine, beverage and refined tea manufacturing industry	554304704	554304704
001208	Valin Cable	2021	2.61854e+09	C38	1	2020	300252	Kingsignal	5.55669e+09	Electrical machinery and equipment manufacturing industry	2938153984	2938153984
001209	Hongxing Shares	2021	1.55198e+09	C18	1	2020	601566	Jiumuwang	5.90961e+09	Textile, clothing and apparel industry	4357627904	4357627904
001211	Double Gun Technology	2021	1.28504e+09	C20	1	2020	603226	Filinger	1.30032e+09	Wood processing and wood, bamboo, rattan, palm and grass products industry	15283802	15283802
002007	Hualan Biotechnology	2015	4.02149e+09	C27	1	2014	000513	Livzon Group	7.30261e+09	Pharmaceutical Manufacturing	3281111552	3281111552
002020	Beijing New Pharmaceutical	2015	2.93989e+09	C27	1	2014	000566	Hainan Haiyao	3.67337e+09	Pharmaceutical Manufacturing	733480896	733480896
002032	Supor	2020	1.22923e+10	C33	1	2019	002846	Actis Shares	1.46194e+09	Metal products industry	-10830331904	10830331904
002052	Tongzhou Electronics	2021	4.85737e+08	C39	1	2020	300078	Chuang Medical	4.7097e+09	Computer, communication and other electronic equipment manufacturing	4223962368	4223962368
002057	Sinosteel Tianyuan	2016	6.87197e+08	C26	1	2015	002591	Evergrande Hi-Tech	9.28473e+08	Chemical raw materials and chemical products manufacturing industry	241275952	241275952
002064	Huafeng Spandex	2019	1.69746e+10	C28	1	2018	603225	Xinfengming	1.71692e+10	Chemical fiber manufacturing industry	194570928	194570928
002069	Zhangzidao	2018	3.55434e+09	A04	1	2017	002696	Baiyang Shares	3.58068e+09	Fisheries	26336916	26336916
002069	Zhangzidao	2019	3.00928e+09	A04	1	2018	600097	Create International	2.30672e+09	Fisheries	-702559040	702559040
002069	Zhangzidao	2021	2.47047e+09	A04	1	2020	002696	Baiyang Shares	2.78587e+09	Fisheries	315397696	315397696
002071	Great Wall Films	2019	1.36176e+09	R86	1	2018	600088	China Television Media	1.58427e+09	Radio, television, film and video recording production industry	222510800	222510800
002086	*STToyo	2020	3.26319e+09	A04	1	2019	002696	Baiyang Shares	2.96519e+09	Fisheries	-298001440	298001440
002099	Haixiang Pharmaceutical	2019	6.7472e+09	C27	1	2018	002262	Enhua Pharmaceutical	4.03017e+09	Pharmaceutical Manufacturing	-2717033216	2717033216
002114	Luoping Zinc and Electricity	2018	2.1941e+09	C32	1	2017	000962	Oriental Tantalum	2.04301e+09	Non-ferrous metal smelting and rolling processing industry	-151085664	151085664
002114	Luoping Zinc and Electricity	2021	2.36012e+09	C32	1	2020	600331	Hongda Shares	2.3272e+09	Non-ferrous metal smelting and rolling processing industry	-32919582	32919582
002118	Zixin Pharmaceutical	2015	4.99811e+09	C27	1	2014	000538	Yunnan Baiyao	1.63413e+10	Pharmaceutical Manufacturing	11343233024	11343233024
002118	Zixin Pharmaceutical	2018	9.9192e+09	C27	1	2017	300026	Red Sun Pharmaceutical	7.42822e+09	Pharmaceutical Manufacturing	-2490983680	2490983680
002122	*STPegasus	2018	7.78761e+09	C34	1	2017	002472	Double ring transmission	7.48718e+09	General equipment manufacturing industry	-300425568	300425568
002127	Antarctic E-commerce	2015	1372789852	L72	1	2014	300336	New Text Retreat	1.40334e+09	Business Services	30549800	30549800
002131	Leo shares	2017	1.33442e+10	I64	1	2016	300315	Ourpalm Technology	1.04014e+10	Internet and related services	-2942814976	2942814976
002131	Leo shares	2018	1.41746e+10	I64	1	2017	002467	263	2.3759e+09	Internet and related services	-11798652928	11798652928
002161	Yuanwang Valley	2017	2.27937e+09	C39	1	2016	002289	STYushun	1.38671e+09	Computer, communication and other electronic equipment manufacturing	-892664576	892664576
002164	Ningbo Dongli	2018	1.70064e+09	C35	1	2017	300529	Jianfan Bio	1.7024e+09	Special equipment manufacturing industry	1.7638e+06	1.7638e+06
002164	Ningbo Dongli	2021	2.35778e+09	C35	1	2020	300097	Zhiyun Shares	2.34879e+09	Special equipment manufacturing industry	-8990760	8990760
002167	Oriental Zirconium	2018	2.43915e+09	C32	1	2017	002114	Luoping Zinc and Electricity	2.35535e+09	Non-ferrous metal smelting and rolling processing industry	-83808352	83808352
002171	Chujiang New Materials	2021	1.32625e+10	C32	1	2020	600362	Jiangxi Copper	140881552897	Non-ferrous metal smelting and rolling processing industry	127619072000	127619072000
002174	YOOZOO Network	2020	8592711982	I64	1	2019	000606	Smooth withdrawal	2.7945e+09	Internet and related services	-5798213120	5798213120
002175	*STEast Net	2018	1.15062e+09	C40	1	2017	603416	Xinjie Electric	1.12775e+09	Instrument manufacturing industry	-22863478	22863478
002181	Guangdong Media	2019	4.5499e+09	L72	1	2018	300280	Zitian Technology	2.19417e+09	Business Services	-2355724032	2355724032
002181	Guangdong Media	2021	5.30905e+09	L72	1	2020	603569	Long-term logistics	5.30101e+09	Business Services	-8.03858e+06	8.03858e+06
002194	*STFangu	2018	2.09421e+09	C39	1	2017	002396	StarNet Ruijie	6.43991e+09	Computer, communication and other electronic equipment manufacturing	4345702400	4345702400
002194	*STFangu	2019	2.42761e+09	C39	1	2018	002618	Danbangtui	2.41919e+09	Computer, communication and other electronic equipment manufacturing	-8416436	8416436
002194	Wuhan FanGu	2020	2.67317e+09	C39	1	2019	300615	Xintian Technology	5.43587e+08	Computer, communication and other electronic equipment manufacturing	-2129578880	2129578880
002198	Jiaying Pharmaceutical	2018	8.89559e+08	C27	1	2017	300289	Liedman	1.75389e+09	Pharmaceutical Manufacturing	864333952	864333952
002219	Hengkang Medical	2019	4.90989e+09	Q83	1	2018	002173	Innovative Medical	4.26528e+09	health	-644607232	644607232
002235	Anne shares	2021	1.50697e+09	I64	1	2020	000606	Smooth withdrawal	1.50269e+09	Internet and related services	-4274497	4274497
002243	Tongchan Lixing	2018	1.98721e+09	C29	1	2017	002224	Sanlishi	1.97553e+09	Rubber and plastic products industry	-11685818	11685818
002263	Greater Southeast	2021	2.96155e+09	C29	1	2020	300587	Tiantie Shares	2.96547e+09	Rubber and plastic products industry	3.92014e+06	3.92014e+06
002278	Shenkai Shares	2015	1.74757e+09	C35	1	2014	000519	China Army Red Arrow	4.90829e+09	Special equipment manufacturing industry	3160716800	3160716800
002278	Shenkai Shares	2020	1.72129e+09	C35	1	2019	600388	Longking Environmental Protection	2.1583e+10	Special equipment manufacturing industry	19861716992	19861716992
002288	Chaohua Technology	2017	2.71747e+09	C39	1	2016	002782	Click	1.0351e+09	Computer, communication and other electronic equipment manufacturing	-1682369920	1682369920
002288	Chaohua Technology	2018	2.76897e+09	C39	1	2017	300319	Microgate Technology	3.10938e+09	Computer, communication and other electronic equipment manufacturing	340409408	340409408
002288	Chaohua Technology	2019	3.20419e+09	C39	1	2018	300433	Lens Technology	4.314e+10	Computer, communication and other electronic equipment manufacturing	39935836160	39935836160
002288	Chaohua Technology	2020	3.81495e+09	C39	1	2019	300042	Netac Technology	1.08557e+09	Computer, communication and other electronic equipment manufacturing	-2729383168	2729383168
002288	Chaohua Technology	2021	3.66534e+09	C39	1	2020	002134	Tianjin Prin	5.95064e+08	Computer, communication and other electronic equipment manufacturing	-3070274304	3070274304
002289	*STYushun	2018	5.99599e+08	C39	1	2017	000020	Deep HuafaA	6.29763e+08	Computer, communication and other electronic equipment manufacturing	30164104	30164104
002291	Saturday	2018	3.07266e+09	C18	1	2017	002003	Weixing Shares	3.03285e+09	Textile, clothing and apparel industry	-39808760	39808760
002304	Yanghe Shares	2019	5.3455e+10	C15	1	2018	600600	Tsingtao Beer	34075265005	Wine, beverage and refined tea manufacturing industry	-19379773440	19379773440
002306	*STCloud Network	2015	1.79552e+08	I64	1	2014	000606	Smooth withdrawal	1.32576e+09	Internet and related services	1146203264	1146203264
002306	*STCloud Network	2018	9.12765e+07	I64	1	2017	600226	Hanye Shares	5.454e+09	Internet and related services	5362722304	5362722304
002306	STCloud Network	2019	8.64979e+07	I64	1	2018	002131	Leo shares	1.41746e+10	Internet and related services	14088059904	14088059904
002306	STCloud Network	2020	2.16046e+08	I64	1	2019	002447	Chenxin Retreat	7.33315e+08	Internet and related services	517269056	517269056
002316	Asia United Development	2015	1.96043e+09	I65	1	2014	600718	Neusoft Group	9622139524	Software and information technology services	7661707264	7661707264
002316	Asia United Development	2016	2.09484e+09	I65	1	2015	300170	Hande Information	2.10838e+09	Software and information technology services	13544906	13544906
002330	Delis	2016	1.78368e+09	C13	1	2015	000639	Xiwang Food	1.74248e+09	Agricultural and sideline food processing industry	-41198428	41198428
002330	Delis	2018	1.79421e+09	C13	1	2017	603668	Tianma Technology	1.65803e+09	Agricultural and sideline food processing industry	-136183632	136183632
002331	Wantong Technology	2021	2.78571e+09	I65	1	2020	002642	Ronglian Technology	2.78963e+09	Software and information technology services	3.91685e+06	3.91685e+06
002341	Selen Technology	2020	7.74901e+09	C26	1	2019	002917	Jin Ao Bo	8.91786e+08	Chemical raw materials and chemical products manufacturing industry	-6857221120	6857221120
002341	Selen Technology	2021	6.2738e+09	C26	1	2020	300741	Huabao Shares	8349999362	Chemical raw materials and chemical products manufacturing industry	2076197760	2076197760
002354	Tianshen Entertainment	2021	3.58623e+09	I64	1	2020	002131	Leo shares	1.92579e+10	Internet and related services	15671643136	15671643136
002356	*STHermione	2015	2.60822e+09	F52	1	2014	600386	North Pakistan Media	2.64698e+09	Retail	38755372	38755372
002357	Fulin Transport	2018	2.61189e+09	G54	1	2017	600834	Shentong Metro	2.57729e+09	Road transport industry	-34602864	34602864
002362	Hanwang Technology	2015	8.50677e+08	C39	1	2014	300120	Jingweihuikai	7.09346e+08	Computer, communication and other electronic equipment manufacturing	-141331232	141331232
002362	Hanwang Technology	2016	9.38732e+08	C39	1	2015	600435	North Navigation	4.38282e+09	Computer, communication and other electronic equipment manufacturing	3444083456	3444083456
002364	Zhongheng Electric	2020	3.44825e+09	C38	1	2019	300444	Shuangjie Electrical	2.8686e+09	Electrical machinery and equipment manufacturing industry	-579646400	579646400
002370	Asia Pacific Pharmaceuticals	2021	1.61078e+09	C27	1	2020	002019	Yifan Pharmaceutical	1.16372e+10	Pharmaceutical Manufacturing	10026458112	10026458112
002388	New Asia Process	2015	8.65348e+08	C39	1	2014	000988	HGTECH	4.69094e+09	Computer, communication and other electronic equipment manufacturing	3825594368	3825594368
002392	Beijing Lier	2019	5.59019e+09	C30	1	2018	600366	Ningbo Yunsheng	5.52621e+09	Non-metallic mineral products industry	-63976872	63976872
002422	Kelun Pharmaceutical	2015	22583347327	C27	1	2014	002437	Yuheng Pharmaceutical	4.92235e+09	Pharmaceutical Manufacturing	-17660997632	17660997632
002426	*STvictory	2020	1.11883e+10	C39	1	2019	300582	Infit	1.73531e+09	Computer, communication and other electronic equipment manufacturing	-9453037568	9453037568
002426	Victory Precision	2021	9.18384e+09	C39	1	2020	600171	Shanghai Belling	3.87953e+09	Computer, communication and other electronic equipment manufacturing	-5304308224	5304308224
002444	Giant Star Technology	2019	1.11325e+10	C33	1	2018	002545	Oriental Tower	1.13637e+10	Metal products industry	231250640	231250640
002450	*STKant	2019	9.02888e+09	C29	1	2018	000599	Qingdao Doublestar	8.96548e+09	Rubber and plastic products industry	-63403284	63403284
002456	OFILM	2019	4.05595e+10	C39	1	2018	002199	Dongjing Electronics	4.78193e+08	Computer, communication and other electronic equipment manufacturing	-40081330176	40081330176
002456	OFILM	2021	2.46372e+10	C39	1	2020	000586	Huiyuan Communications	4.90848e+08	Computer, communication and other electronic equipment manufacturing	-24146337792	24146337792
002470	Jinzhengda	2019	2.09271e+10	C26	1	2018	002601	Longbai Group	2.09237e+10	Chemical raw materials and chemical products manufacturing industry	-3.45221e+06	3.45221e+06
002470	Jinzhengda	2021	1.41701e+10	C26	1	2020	003022	Lianhong New Materials	9.54525e+09	Chemical raw materials and chemical products manufacturing industry	-4624870400	4624870400
002473	Santa Leda	2018	3.75055e+08	C38	1	2017	603333	Shangwei Shares	1.81023e+09	Electrical machinery and equipment manufacturing industry	1435176960	1435176960
002473	Santa Leda	2019	2.40568e+08	C38	1	2018	000806	Galaxy Retreat	2.48208e+09	Electrical machinery and equipment manufacturing industry	2241516288	2241516288
002477	*STEagle	2018	2.10675e+10	A03	1	2017	002714	Muyuan shares	2.40446e+10	Animal Husbandry	2977173504	2977173504
002488	Jingu shares	2016	4.24163e+09	C36	1	2015	002284	Asia Pacific Shares	4.25212e+09	Automotive Manufacturing	10494303	10494303
002488	Jingu shares	2020	6.35412e+09	C36	1	2019	300742	*STYuebo	1.65117e+09	Automotive Manufacturing	-4702944768	4702944768
002490	Shandong Molong	2017	6.2228e+09	C35	1	2016	600761	Anhui Heli	6.38066e+09	Special equipment manufacturing industry	157856688	157856688
002490	Shandong Molong	2018	6.60754e+09	C35	1	2017	000157	Zoomlion	8.31491e+10	Special equipment manufacturing industry	76541534208	76541534208
002490	Shandong Molong	2020	5.17564e+09	C35	1	2019	603185	Hongyuan Green Energy	2.76255e+09	Special equipment manufacturing industry	-2413083648	2413083648
002490	Shandong Molong	2021	4.45761e+09	C35	1	2020	300753	Aipeng Medical	8.27239e+08	Special equipment manufacturing industry	-3630371840	3630371840
002491	Tongding Internet	2016	6.74048e+09	C38	1	2015	002184	Hyde Control	1.93917e+09	Electrical machinery and equipment manufacturing industry	-4801315840	4801315840
002496	Huifeng Shares	2018	5.96062e+09	C26	1	2017	000902	Xinyangfeng	8.74522e+09	Chemical raw materials and chemical products manufacturing industry	2784603904	2784603904
002496	Huifeng Shares	2019	5.41484e+09	C26	1	2018	300610	Chenhua shares	8.93033e+08	Chemical raw materials and chemical products manufacturing industry	-4521807360	4521807360
002499	*STColin	2015	1.02494e+09	D44	1	2014	300335	Deson shares	1.03513e+09	Electricity, heat production and supply industry	10189891	10189891
002501	*STLiyuan	2019	2.93519e+09	C32	1	2018	300337	Yinbang Shares	2.80738e+09	Non-ferrous metal smelting and rolling processing industry	-127807728	127807728
002503	Search for special	2021	6.75234e+09	C18	1	2020	603518	Jinhong Group	5.6271e+09	Textile, clothing and apparel industry	-1125235072	1125235072
002506	GCL Integration	2015	1.47859e+10	C39	1	2014	000021	Deep Technology	1.44504e+10	Computer, communication and other electronic equipment manufacturing	-335437600	335437600
002506	GCL Integration	2016	2.03289e+10	C39	1	2015	600060	Hisense Video	2.09213e+10	Computer, communication and other electronic equipment manufacturing	592463104	592463104
002509	Tianguang Zhongmao	2015	5.10791e+09	C35	1	2014	601908	Beijing Express	5.40038e+09	Special equipment manufacturing industry	292465696	292465696
002513	Lanfeng Biochemical	2015	4.03264e+09	C26	1	2014	002226	Jiangnan Chemical	4.02522e+09	Chemical raw materials and chemical products manufacturing industry	-7418541	7418541
002513	Lanfeng Biochemical	2021	1.72795e+09	C26	1	2020	300072	Haixin Energy	1.88893e+10	Chemical raw materials and chemical products manufacturing industry	17161347072	17161347072
002517	Kaiying Network	2015	1.35488e+09	I64	1	2014	002174	YOOZOO Network	1.37549e+09	Internet and related services	20608000	20608000
002565	Shunhao Shares	2015	3.42903e+09	C22	1	2014	600793	Yibin Paper Industry	3.05503e+09	Paper and paper products industry	-373999232	373999232
002566	Yisheng Pharmaceutical	2017	2.65349e+09	C27	1	2016	600222	Tailong Pharmaceutical	2.65083e+09	Pharmaceutical Manufacturing	-2.65899e+06	2.65899e+06
002566	Yisheng Pharmaceutical	2018	2.5531e+09	C27	1	2017	000566	Hainan Haiyao	1.05474e+10	Pharmaceutical Manufacturing	7994262016	7994262016
002569	*STBusen	2015	6.84554e+08	C18	1	2014	600137	Langsha Shares	5.99667e+08	Textile, clothing and apparel industry	-84886280	84886280
002569	*STBusen	2016	6.27281e+08	C18	1	2015	600137	Langsha Shares	5.45049e+08	Textile, clothing and apparel industry	-82232408	82232408
002569	*STBusen	2017	7.12471e+08	C18	1	2016	600137	Langsha Shares	5.8593e+08	Textile, clothing and apparel industry	-126541256	126541256
002570	Beingmate	2018	5.04549e+09	C14	1	2017	000716	Black sesame	5.04678e+09	Food Manufacturing	1.2922e+06	1.2922e+06
002571	Deli shares	2015	2.22876e+09	C30	1	2014	000012	CSGA	15284388305	Non-metallic mineral products industry	13055632384	13055632384
002571	Deli shares	2017	1883484947	C30	1	2016	603616	Han Jianheshan	1.79474e+09	Non-metallic mineral products industry	-88748864	88748864
002575	Qunxing Toys	2015	9.61824e+08	C24	1	2014	002348	Gaole shares	1.1928e+09	Cultural, educational, arts and crafts, sports and entertainment products manufacturing	230980176	230980176
002592	Balin Technology	2015	2.54482e+09	C36	1	2014	002126	Yinlun Shares	3.51477e+09	Automotive Manufacturing	969950016	969950016
002594	BYD	2021	295780147000	C36	1	2020	600686	King Long Motors	2.37208e+10	Automotive Manufacturing	-272059351040	272059351040
002606	Dalian Insulators	2017	1.47351e+09	C38	1	2016	601126	Sifang Shares	5.52299e+09	Electrical machinery and equipment manufacturing industry	4049486336	4049486336
002608	Jiangsu Guoxin	2015	4.30627e+10	D44	1	2014	600969	Chendian International	6.92134e+09	Electricity, heat production and supply industry	-36141314048	36141314048
002608	Jiangsu Guoxin	2016	4.32433e+10	D44	1	2015	600236	Laurel Power	4.34044e+10	Electricity, heat production and supply industry	161126448	161126448
002608	Jiangsu Guoxin	2017	4.58057e+10	D44	1	2016	000767	Jinkong Power	4.53962e+10	Electricity, heat production and supply industry	-409483584	409483584
002609	Jieshun Technology	2018	2.55807e+09	I65	1	2017	300150	Century Real	2.5663e+09	Software and information technology services	8.23424e+06	8.23424e+06
002613	North Glass Co., Ltd.	2020	2.10667e+09	C35	1	2019	603283	Saiteng shares	2.08993e+09	Special equipment manufacturing industry	-16736085	16736085
002617	Roshow Technology	2015	1.8629e+09	C38	1	2014	002706	Liangxin Shares	1.03876e+09	Electrical machinery and equipment manufacturing industry	-824139264	824139264
002618	Danbang Technology	2020	1.74989e+09	C39	1	2019	300802	Matrix Technology	1.11426e+09	Computer, communication and other electronic equipment manufacturing	-635623552	635623552
002626	Jindawei	2020	5.15267e+09	C14	1	2019	603866	Peach and plum bread	5.18604e+09	Food Manufacturing	33373882	33373882
002638	Qinshang Shares	2016	7.16344e+09	C38	1	2015	000333	Midea Group	128841935000	Electrical machinery and equipment manufacturing industry	121678495744	121678495744
002640	Cross-border	2020	6.18706e+09	F52	1	2019	600327	Great Eastern	6.01679e+09	Retail	-170271984	170271984
002640	Cross-border	2021	3.73621e+09	F52	1	2020	600653	Shenhua Holdings	5.22214e+09	Retail	1485929344	1485929344
002646	Green barley wine	2018	2.93956e+09	C15	1	2017	000596	Gujing Gongjiu	1.01529e+10	Wine, beverage and refined tea manufacturing industry	7213305344	7213305344
002647	Rendong Holdings	2015	2.11705e+09	J69	1	2014	600390	Minmetals Capital	2.15866e+09	Other financial industries	41604524	41604524
002650	Gaga Food	2019	2.72516e+09	C14	1	2018	002770	Cody withdraws	3.38157e+09	Food Manufacturing	656415424	656415424
002650	Gaga Food	2021	3.02174e+09	C14	1	2020	002216	Sanquan Foods	5.99624e+09	Food Manufacturing	2974505472	2974505472
002652	Yangzi New Materials	2020	1.02558e+09	C33	1	2019	002135	Southeast Grid	1.14435e+10	Metal products industry	10417892352	10417892352
002667	Anzhong Shares	2017	8.81334e+08	C35	1	2016	600879	Aerospace Electronics	1.95815e+10	Special equipment manufacturing industry	18700169216	18700169216
002667	Anzhong Shares	2020	9.0755e+08	C35	1	2019	603800	Dawson shares	1.753e+09	Special equipment manufacturing industry	845449408	845449408
002671	Longquan Shares	2015	2.46731e+09	C30	1	2014	600293	Three Gorges New Materials	2.56767e+09	Non-metallic mineral products industry	100356368	100356368
002679	Fujian Jinsen	2016	1.66951e+09	A02	1	2015	002200	STTrading	2.88463e+09	forestry	1215122304	1215122304
002714	Muyuan shares	2021	1.77266e+11	A03	1	2020	600975	New Ng Fung	2.22852e+09	Animal Husbandry	-175037235200	175037235200
002715	Dengyun Shares	2017	6.98793e+08	C36	1	2016	300428	Lizhong Group	7.32282e+08	Automotive Manufacturing	33489014	33489014
002715	Dengyun Shares	2018	7.82091e+08	C36	1	2017	603335	Dickson Force	8.82495e+08	Automotive Manufacturing	100403912	100403912
002723	Kim Wright	2019	1.23571e+09	C38	1	2018	002518	Costa	3.54174e+09	Electrical machinery and equipment manufacturing industry	2306024704	2306024704
002736	Guosen Securities	2020	3.02756e+11	J67	1	2019	000166	Shenwan Hongyuan	3.88537e+11	Capital Market Services	85781389312	85781389312
002759	Tianji Shares	2021	4.55111e+09	C38	1	2020	603988	China Electric Motor	1.26555e+09	Electrical machinery and equipment manufacturing industry	-3285566208	3285566208
002765	Landai Transmission	2015	1.57951e+09	C36	1	2014	300258	Precision Forging Technology	1.58787e+09	Automotive Manufacturing	8359832	8359832
002770	Cody Dairy	2021	2.4144e+09	C14	1	2020	605179	Yiming Food	2.41462e+09	Food Manufacturing	216838	216838
002774	Kuaiyi Elevator	2018	1.53537e+09	C34	1	2017	000404	Changhong Huayi	9.9782e+09	General equipment manufacturing industry	8442826240	8442826240
002816	Kodak	2018	6.53306e+08	C34	1	2017	300540	Shu Road Equipment	962608715	General equipment manufacturing industry	309302848	309302848
002863	Today's Flying Al Qaeda	2019	4.46291e+09	C36	1	2018	600501	Aerospace Morning Light	4.51179e+09	Automotive Manufacturing	48871812	48871812
002909	Jitai Shares	2017	8.245e+08	C26	1	2016	002588	Stanley	6.85799e+09	Chemical raw materials and chemical products manufacturing industry	6033486336	6033486336
002912	Sinosig	2019	2.11897e+09	I65	1	2018	300386	Feitian Integrity	2.01263e+09	Software and information technology services	-106343480	106343480
002927	Taiyong Long March	2018	8.25143e+08	C38	1	2017	002335	Kehua Data	6.20694e+09	Electrical machinery and equipment manufacturing industry	5381799936	5381799936
002927	Taiyong Long March	2020	1.21313e+09	C38	1	2019	002606	Dalian Insulators	1.35033e+09	Electrical machinery and equipment manufacturing industry	137196544	137196544
002990	Shengshi Technology	2020	2.47024e+09	I65	1	2019	300300	Strait Innovation	2.45925e+09	Software and information technology services	-10980834	10980834
002993	Aohai Technology	2020	4.19747e+09	C39	1	2019	300177	Zhonghaida	3.17485e+09	Computer, communication and other electronic equipment manufacturing	-1022623936	1022623936
002995	Tiandi Online	2020	1.63333e+09	I64	1	2019	002095	Business treasure	1.59535e+09	Internet and related services	-37982220	37982220
003018	Jinfu Technology	2020	1.33785e+09	C29	1	2019	603806	Foster	8.30511e+09	Rubber and plastic products industry	6967261696	6967261696
003028	Zhenbang Intelligence	2020	1.42452e+09	C39	1	2019	603933	Smart Energy Technology	1.42412e+09	Computer, communication and other electronic equipment manufacturing	-399288	399288
300028	Jinya Technology	2015	9.6417e+08	C39	1	2014	002600	Leading Intelligent Manufacturing	2.75201e+09	Computer, communication and other electronic equipment manufacturing	1787839104	1787839104
300028	Jinya Technology	2016	4.95082e+08	C39	1	2015	002782	Click	9.62396e+08	Computer, communication and other electronic equipment manufacturing	467313824	467313824
300028	Jinya Technology	2017	3.10909e+08	C39	1	2016	300555	STRoad access	7.95961e+08	Computer, communication and other electronic equipment manufacturing	485051808	485051808
300028	Jinya Technology	2018	2.19207e+08	C39	1	2017	000100	TCLscience and technology	160293984000	Computer, communication and other electronic equipment manufacturing	160074776576	160074776576
300032	Jinlong Electromechanical	2019	2.35604e+09	C38	1	2018	600973	Baosheng Shares	1.66601e+10	Electrical machinery and equipment manufacturing industry	14304071680	14304071680
300033	Flush	2015	3.55817e+09	J69	1	2014	002647	Rendong Holdings	2.66813e+09	Other financial industries	-890039680	890039680
300034	Steel Research Institute	2018	2.5843e+09	C32	1	2017	000612	Jiaozuo Wanfang	7.46478e+09	Non-ferrous metal smelting and rolling processing industry	4880471040	4880471040
300046	Taiji Shares	2021	1.10735e+09	C39	1	2020	600405	Power Source	2.56175e+09	Computer, communication and other electronic equipment manufacturing	1454400000	1454400000
300052	Zhongqingbao	2018	1.22789e+09	I64	1	2017	002095	Business treasure	1.29473e+09	Internet and related services	66843384	66843384
300056	Zhongchuang Environmental Protection	2019	1.90322e+09	C35	1	2018	601608	CITIC Heavy Industries	1.9659e+10	Special equipment manufacturing industry	17755758592	17755758592
300064	STKing Kong	2020	6.37761e+09	C30	1	2019	000012	CSGA	18201235959	Non-metallic mineral products industry	11823626240	11823626240
300064	Henan Diamond	2021	5.88708e+09	C30	1	2020	600366	Ningbo Yunsheng	6.00702e+09	Non-metallic mineral products industry	119940624	119940624
300071	Huayi Jiaxin	2018	2.79656e+09	L72	1	2017	000785	Easyhome	2.83151e+09	Business Services	34947360	34947360
300071	Huayi Jiaxin	2019	1.8755e+09	L72	1	2018	002010	Transfar	2.99296e+10	Business Services	28054130688	28054130688
300071	Huayi Jiaxin	2020	1.22237e+09	L72	1	2019	900929	JinlvBshare	1.30816e+09	Business Services	85789928	85789928
300077	National Technology	2018	2.84922e+09	C39	1	2017	600888	Xinjiang Zhonghe	1.01355e+10	Computer, communication and other electronic equipment manufacturing	7286258176	7286258176
300086	Kangzhi Pharmaceutical	2015	2.08986e+09	C27	1	2014	600851	Haixin Shares	7.26571e+09	Pharmaceutical Manufacturing	5175846912	5175846912
300093	Diamond Glass	2020	9.89982e+08	C30	1	2019	600668	Peak Group	5.47518e+09	Non-metallic mineral products industry	4485196288	4485196288
300093	Diamond Glass	2021	1.38978e+09	C30	1	2020	000672	Shangfeng Cement	1.13037e+10	Non-metallic mineral products industry	9913957376	9913957376
300097	Zhiyun Shares	2015	1.99466e+09	C35	1	2014	000157	Zoomlion	9.3758e+10	Special equipment manufacturing industry	91763294208	91763294208
300104	LeTV	2015	1.69822e+10	I64	1	2014	002530	Jincai Internet	1.00125e+09	Internet and related services	-15980908544	15980908544
300104	LeTV	2016	3.22338e+10	I64	1	2015	300315	Ourpalm Technology	7.87825e+09	Internet and related services	-24355575808	24355575808
300104	LeTV	2017	1.78976e+10	I64	1	2016	002464	Everyone should retreat	2.10376e+09	Internet and related services	-15793887232	15793887232
300104	LeTV	2018	8.45001e+09	I64	1	2017	600640	Guomai Culture	6.50794e+09	Internet and related services	-1942064640	1942064640
300104	LeTV	2019	5.90756e+09	I64	1	2018	300043	Star Entertainment	5.95558e+09	Internet and related services	48027072	48027072
300117	Jiayu shares	2017	5.56054e+09	E50	1	2016	002620	Ruihe shares	3.7307e+09	Building decoration and other construction industries	-1829839488	1829839488
300118	Risen	2016	9.96466e+09	C38	1	2015	000836	Futong Information	3.34914e+09	Electrical machinery and equipment manufacturing industry	-6615518720	6615518720
300125	Easystar	2019	1.23315e+09	C38	1	2018	002617	Roshow Technology	5.20792e+09	Electrical machinery and equipment manufacturing industry	3974769664	3974769664
300126	Ruiqi Shares	2016	1.29588e+09	C34	1	2015	000837	Qinchuan Machine Tool	6.73347e+09	General equipment manufacturing industry	5437590528	5437590528
300132	Qingsong Shares	2019	4.65503e+09	C26	1	2018	603192	Huide Technology	1.63442e+09	Chemical raw materials and chemical products manufacturing industry	-3020610816	3020610816
300133	Huace Films	2020	8.29021e+09	R86	1	2019	300251	Enlight Media	1.09891e+10	Radio, television, film and video recording production industry	2698902528	2698902528
300134	Dafu Technology	2021	6.26373e+09	C39	1	2020	688608	Hengxuan Technology	5.76432e+09	Computer, communication and other electronic equipment manufacturing	-499410240	499410240
300135	Baoli International	2017	3.06582e+09	C26	1	2016	000525	STRed Sun	1.05545e+10	Chemical raw materials and chemical products manufacturing industry	7488685568	7488685568
300142	Watson Bio	2018	7.23702e+09	C27	1	2017	300267	Erkang Pharmaceutical	5.72007e+09	Pharmaceutical Manufacturing	-1516953088	1516953088
300146	By-Health	2019	8.33071e+09	C14	1	2018	600866	Star Lake Technology	1.44535e+09	Food Manufacturing	-6885358080	6885358080
300148	Tianzhou Culture	2016	4.94485e+09	I64	1	2015	002555	37 Interactive Entertainment	4.62331e+09	Internet and related services	-321540640	321540640
300157	Hengtai Aipu	2016	5.74539e+09	B11	1	2015	603979	Jinchengxin	4.57799e+09	Mining support activities	-1167402112	1167402112
300157	Hengtai Aipu	2020	3.46822e+09	B11	1	2019	603727	BOMAC	3.15557e+09	Mining support activities	-312649024	312649024
300160	Xiu Qiang Shares	2020	1.74134e+09	C30	1	2019	603256	Macromedia Technology	1.89542e+09	Non-metallic mineral products industry	154085936	154085936
300161	Huazhong CNC	2016	2.21392e+09	C34	1	2015	002520	RIFA SEIKI	2.43157e+09	General equipment manufacturing industry	217657232	217657232
300165	Skyray Instruments	2019	2.15546e+09	C40	1	2018	300430	Chengyitong	2.12348e+09	Instrument manufacturing industry	-31974056	31974056
300167	DWI	2015	1.21957e+09	I65	1	2014	300253	Weining Health	1.21802e+09	Software and information technology services	-1.54892e+06	1.54892e+06
300168	Wanda Information	2021	7.14477e+09	I65	1	2020	600718	Neusoft Group	16407700975	Software and information technology services	9262932992	9262932992
300178	Tengbang International	2020	4.79251e+09	L72	1	2019	002127	Antarctic E-commerce	5.48482e+09	Business Services	692308800	692308800
300201	Helenge	2021	2.32984e+09	C35	1	2020	300368	Huijin Shares	3.53547e+09	Special equipment manufacturing industry	1205632896	1205632896
300204	Shutaishen	2020	1.85621e+09	C27	1	2019	002412	Hansen Pharmaceuticals	1.88291e+09	Pharmaceutical Manufacturing	26700006	26700006
300208	Qingdao medium-range	2019	5.74681e+09	C38	1	2018	603488	Zhanpeng Technology	9.34825e+08	Electrical machinery and equipment manufacturing industry	-4811982848	4811982848
300213	Jiaxun Feihong	2021	3.03194e+09	C39	1	2020	300367	Network force retreat	3.0297e+09	Computer, communication and other electronic equipment manufacturing	-2241332	2241332
300215	Institute of Electrical Engineering	2016	3.73983e+09	M74	1	2015	603018	China Construction Group	3.72532e+09	Professional technical services	-14507461	14507461
300216	Qianshan Pharmaceutical Machinery	2019	2260476525	C35	1	2018	300210	Senyuan Shares	2.24294e+09	Special equipment manufacturing industry	-17535244	17535244
300217	Oriental Electric Heating	2021	5.33442e+09	C38	1	2020	002733	Xiongtao Shares	5.21091e+09	Electrical machinery and equipment manufacturing industry	-123508088	123508088
300226	Shanghai Steel Union	2019	1.08042e+10	I64	1	2018	300459	Talking Tom	1.28398e+10	Internet and related services	2035669504	2035669504
300249	Imikon	2019	2.81136e+09	I65	1	2018	002316	Asia United Development	3.16459e+09	Software and information technology services	353228928	353228928
300251	Enlight Media	2018	1.08461e+10	R86	1	2017	600715	Cultural Investment Holdings	1.04994e+10	Radio, television, film and video recording production industry	-346711008	346711008
300255	Changshan Pharmaceutical	2020	4.57256e+09	C27	1	2019	600479	Qianjin Pharmaceutical	3.81217e+09	Pharmaceutical Manufacturing	-760384064	760384064
300256	Star Technology	2021	3.22708e+09	C39	1	2020	603025	Dahao Technology	2.07246e+09	Computer, communication and other electronic equipment manufacturing	-1154617728	1154617728
300257	Kaishan Shares	2021	1.16082e+10	C34	1	2020	601177	Hangzhou Gear Moving Forward	4.02219e+09	General equipment manufacturing industry	-7586007552	7586007552
300261	Yaben Chemical	2020	3.96334e+09	C26	1	2019	000822	Shandong Haihua	4.51871e+09	Chemical raw materials and chemical products manufacturing industry	555367104	555367104
300261	Yaben Chemical	2021	3.80603e+09	C26	1	2020	000985	Daqing Huake	6.94656e+08	Chemical raw materials and chemical products manufacturing industry	-3111369472	3111369472
300262	Safon Water	2021	3.88565e+09	N77	1	2020	300692	Central Environmental Protection	3.80394e+09	Ecological protection and environmental governance industry	-81709432	81709432
300267	Erkang Pharmaceutical	2017	5.72007e+09	C27	1	2016	000661	Changchun Hi-Tech	6.20352e+09	Pharmaceutical Manufacturing	483453920	483453920
300267	Erkang Pharmaceutical	2018	6.04868e+09	C27	1	2017	603566	Pleco	1.80511e+09	Pharmaceutical Manufacturing	-4243569152	4243569152
300267	Erkang Pharmaceutical	2020	6.5468e+09	C27	1	2019	600422	Kunming Pharmaceutical Group	7.43493e+09	Pharmaceutical Manufacturing	888134400	888134400
300268	Joyvio Holdings	2018	1.21461e+09	C13	1	2017	000639	Xiwang Food	7.70685e+09	Agricultural and sideline food processing industry	6492241408	6492241408
300269	Lianjian Optoelectronics	2018	4.65483e+09	L72	1	2017	300280	Zitian Technology	1.06967e+09	Business Services	-3585158912	3585158912
300269	Lianjian Optoelectronics	2019	2.79993e+09	L72	1	2018	002183	Eternal Asia	43392231949	Business Services	40592306176	40592306176
300269	Lianjian Optoelectronics	2020	1.70187e+09	L72	1	2019	000038	Chase Retreat	2.91716e+09	Business Services	1215297664	1215297664
300269	Lianjian Optoelectronics	2021	1.55067e+09	L72	1	2020	300795	Mio Exhibition	5.30568e+08	Business Services	-1020098880	1020098880
300287	Philips	2019	4.99463e+09	I65	1	2018	300098	Gao Xinxing	8.35019e+09	Software and information technology services	3355559680	3355559680
300291	Hualu Baina	2020	3.85692e+09	R86	1	2019	300182	Jebsen Holdings	1.26835e+10	Radio, television, film and video recording production industry	8826607616	8826607616
300307	Cixing Shares	2020	3.56276e+09	C35	1	2019	002490	Shandong Molong	5.73575e+09	Special equipment manufacturing industry	2172988416	2172988416
300309	JIAI Technology	2017	5.55413e+09	J67	1	2016	000666	Jingwei Textile Machinery	3.53204e+10	Capital Market Services	29766219776	29766219776
300310	Yitong Century	2021	2.72998e+09	I63	1	2020	600996	Guiguang Network	1.61507e+10	Telecommunications, broadcasting and satellite transmission services	13420762112	13420762112
300313	Tianshan Biological	2021	8.42791e+08	A03	1	2020	300106	Western Animal Husbandry	1.07153e+09	Animal Husbandry	228736256	228736256
300332	Tianhao Environment	2016	7.59772e+09	D45	1	2015	600917	Chongqing Gas	7.91136e+09	Gas production and supply industry	313637760	313637760
300359	All-Access Education	2018	2.15507e+09	I65	1	2017	600410	Teamsun	1.20464e+10	Software and information technology services	9891368960	9891368960
300359	All-Access Education	2019	1.35084e+09	I65	1	2018	300556	Silk Road Vision	7.96544e+08	Software and information technology services	-554300544	554300544
300363	Boten shares	2020	4.49694e+09	C27	1	2019	300181	Zoli Pharmaceutical	2.05065e+09	Pharmaceutical Manufacturing	-2446293504	2446293504
300367	Oriental Network Power	2020	3.0297e+09	C39	1	2019	600498	FiberHome	3.14911e+10	Computer, communication and other electronic equipment manufacturing	28461355008	28461355008
300372	Xintai Retirement	2015	1.19486e+09	C38	1	2014	300265	Optical cable	1.20263e+09	Electrical machinery and equipment manufacturing industry	7768373	7768373
300372	Xintai Retirement	2016	9.14463e+08	C38	1	2015	300491	Tonghe Technology	5.26293e+08	Electrical machinery and equipment manufacturing industry	-388169824	388169824
300378	Dingjie Software	2018	2.42963e+09	I65	1	2017	000638	Wanfang Development	9.21668e+08	Software and information technology services	-1507960576	1507960576
300380	iShares Information	2016	6.04839e+08	I65	1	2015	002298	China Electric Power Xingfa	5.09549e+09	Software and information technology services	4490649600	4490649600
300380	iShares Information	2017	6.03379e+08	I65	1	2016	300556	Silk Road Vision	5.92668e+08	Software and information technology services	-10711365	10711365
300396	Dirui Medical	2015	1.76694e+09	C35	1	2014	002021	*STChina Czech Republic	4.08178e+09	Special equipment manufacturing industry	2314835456	2314835456
300399	Jingtianli	2015	4.51838e+08	I65	1	2014	300183	Neusoft Carrier	2.06737e+09	Software and information technology services	1615533184	1615533184
300399	Jingtianli	2016	5.04854e+08	I65	1	2015	300366	Creative Information	1.69253e+09	Software and information technology services	1187676160	1187676160
300399	Jingtianli	2017	5.30337e+08	I65	1	2016	000158	Changshan Beiming	1.28042e+10	Software and information technology services	12273854464	12273854464
300399	Jingtianli	2018	5.19779e+08	I65	1	2017	603138	Massive Data	6.08296e+08	Software and information technology services	88517112	88517112
300413	Mango Super Media	2015	2.35967e+09	R87	1	2014	000681	Visual China	1.5237e+09	Culture and Arts Industry	-835962816	835962816
300431	Baofeng Group	2015	1.34851e+09	I64	1	2014	300104	LeTV withdrawal	8.85102e+09	Internet and related services	7502518272	7502518272
300444	Shuangjie Electrical	2020	2.64856e+09	C38	1	2019	002227	Autexon	1.27925e+09	Electrical machinery and equipment manufacturing industry	-1369310720	1369310720
300461	Tanaka Seiki	2019	4.64499e+08	C35	1	2018	600579	Klaus	1.57348e+10	Special equipment manufacturing industry	15270276096	15270276096
300464	Xinghui Shares	2020	4.04717e+09	F52	1	2019	603101	Huijia Times	3.81069e+09	Retail	-236478768	236478768
300517	Haibo Heavy Industry	2016	9.4796e+08	E48	1	2015	002307	Beixin Road Bridge	1.27081e+10	Civil Engineering and Construction	11760092160	11760092160
300526	Zhongqian Shares	2021	5.42174e+08	C35	1	2020	688001	Huaxing Yuanchuang	3.6454e+09	Special equipment manufacturing industry	3103230720	3103230720
300529	Jianfan Bio	2020	3.21667e+09	C35	1	2019	688108	Sino Medical	1.20562e+09	Special equipment manufacturing industry	-2011049600	2011049600
300537	Guangxin Materials	2021	1.15833e+09	C26	1	2020	002915	Zhongxin Fluorochemicals	1.60227e+09	Chemical raw materials and chemical products manufacturing industry	443932800	443932800
300547	Sichuan Huan Technology	2016	8.23627e+08	C29	1	2015	300321	Tongda Shares	6.8955e+08	Rubber and plastic products industry	-134077328	134077328
300596	Lianlong	2019	3.15014e+09	C26	1	2018	002810	Shandong Heda	1.32181e+09	Chemical raw materials and chemical products manufacturing industry	-1828337152	1828337152
300628	Yealink Networks	2020	5.77936e+09	C39	1	2019	000636	Fenghua Hi-Tech	7.00151e+09	Computer, communication and other electronic equipment manufacturing	1222145152	1222145152
300655	Jingrui Shares	2019	1.30117e+09	C26	1	2018	600301	Huaxi Nonferrous	3.95146e+08	Chemical raw materials and chemical products manufacturing industry	-906026624	906026624
300666	Jiangfeng Electronics	2020	2.3715e+09	C39	1	2019	300102	Qianzhao Optoelectronics	6.89891e+09	Computer, communication and other electronic equipment manufacturing	4527403008	4527403008
300671	Fuman Electronics	2020	1.65229e+09	I65	1	2019	300799	*STZuojiang	7.26325e+08	Software and information technology services	-925967360	925967360
300676	BGI	2018	5.2514e+09	M74	1	2017	603018	China Construction Group	5.26941e+09	Professional technical services	18005688	18005688
300676	BGI	2019	5.90912e+09	M74	1	2018	601965	China Automotive Research Institute	5.70666e+09	Professional technical services	-202453456	202453456
300740	Yujiahui	2019	1.84289e+09	C26	1	2018	603026	Shenghua New Materials	2.77402e+09	Chemical raw materials and chemical products manufacturing industry	931133056	931133056
300740	Yujiahui	2020	2.17251e+09	C26	1	2019	000902	Xinyangfeng	9.71808e+09	Chemical raw materials and chemical products manufacturing industry	7545569280	7545569280
300743	Tiandi Digital	2018	4.81766e+08	C39	1	2017	600498	FiberHome	2.91253e+10	Computer, communication and other electronic equipment manufacturing	28643555328	28643555328
300766	Daily Interaction	2020	2.06313e+09	I64	1	2019	300392	Tengxin Retreat	1.60537e+09	Internet and related services	-457763936	457763936
300766	Daily Interaction	2021	2.10148e+09	I64	1	2020	002072	Kerry	4.03056e+08	Internet and related services	-1698426112	1698426112
300801	Taihe Technology	2020	2.12422e+09	C26	1	2019	002136	Anada	9.04811e+08	Chemical raw materials and chemical products manufacturing industry	-1219410176	1219410176
300814	Zhongfu Circuit	2021	1.82217e+09	C39	1	2020	000536	APT Technology	1.2135e+10	Computer, communication and other electronic equipment manufacturing	10312799232	10312799232
300841	Kanghua Biotechnology	2020	2.14768e+09	C27	1	2019	002422	Kelun Pharmaceutical	31485373711	Pharmaceutical Manufacturing	29337696256	29337696256
300842	Dico Shares	2020	1.61861e+09	C39	1	2019	603023	Weidi Shares	8.24161e+08	Computer, communication and other electronic equipment manufacturing	-794448512	794448512
300849	Jinsheng New Materials	2020	7.41e+08	C29	1	2019	300321	Tongda Shares	7.59432e+08	Rubber and plastic products industry	18432484	18432484
300851	Jiaotong University Sino	2020	1.30528e+09	I65	1	2019	600728	PCIDU Technology	9.80889e+09	Software and information technology services	8503610880	8503610880
300852	Sihui Fushi	2020	1.06915e+09	C39	1	2019	000063	ZTE	141202135000	Computer, communication and other electronic equipment manufacturing	140132990976	140132990976
300858	Ketuo Biotechnology	2020	9.99246e+08	C14	1	2019	002053	Yunnan Energy Investment	8.89605e+09	Food Manufacturing	7896808960	7896808960
300878	Weikang Pharmaceuticals	2020	1.62878e+09	C27	1	2019	000590	Tus-Pharma	8.46744e+08	Pharmaceutical Manufacturing	-782037952	782037952
300886	Huaye Spices	2020	5.47814e+08	C26	1	2019	002805	Fengyuan Shares	9.27805e+08	Chemical raw materials and chemical products manufacturing industry	379991264	379991264
300911	Yitian Intelligence	2021	1.80922e+09	C38	1	2020	002759	Tianji Shares	3.23831e+09	Electrical machinery and equipment manufacturing industry	1429083904	1429083904
300915	Hairong Technology	2020	1.48923e+09	C14	1	2019	300146	By-Health	8.33071e+09	Food Manufacturing	6841476608	6841476608
300921	Nanling Technology	2020	8.80622e+08	I64	1	2019	002306	China Science Cloud Network	8.64979e+07	Internet and related services	-794124160	794124160
300995	Qide New Materials	2021	8.08294e+08	C29	1	2020	300478	Hangzhou Hi-Tech	4.02874e+08	Rubber and plastic products industry	-405420384	405420384
301070	Kaile shares	2021	9.13688e+08	C34	1	2020	002903	Yuhuan CNC	9.54379e+08	General equipment manufacturing industry	40691272	40691272
301071	Power Diamond	2021	1.42354e+09	C30	1	2020	000935	Sichuan Shuangma	5.51706e+09	Non-metallic mineral products industry	4093522944	4093522944
301083	Yum Intelligence	2021	9.01468e+08	C35	1	2020	300326	Kelly Tai	3.6808e+09	Special equipment manufacturing industry	2779332608	2779332608
600035	Chutian Expressway	2016	8.88681e+09	G54	1	2015	000828	Dongguan Holdings	8.32233e+09	Road transport industry	-564480128	564480128
600074	*STBaoqian	2017	2.01383e+09	C39	1	2016	300065	Highlander	1.8087e+09	Computer, communication and other electronic equipment manufacturing	-205128704	205128704
600074	*STBaoqian	2018	7.08758e+08	C39	1	2017	002796	SEGA TECHNOLOGY	6.97814e+08	Computer, communication and other electronic equipment manufacturing	-10944422	10944422
600076	Kangxin New Materials	2015	3.66247e+09	C20	1	2014	600321	Zhengyuan Shares	3.48601e+09	Wood processing and wood, bamboo, rattan, palm and grass products industry	-176458592	176458592
600078	Chengxing Shares	2017	7.95412e+09	C26	1	2016	002440	Runtu Shares	7.8394e+09	Chemical raw materials and chemical products manufacturing industry	-114719816	114719816
600078	Chengxing Shares	2019	8.07563e+09	C26	1	2018	000565	Chongqing Three GorgesA	1.46873e+09	Chemical raw materials and chemical products manufacturing industry	-6606907904	6606907904
600078	Chengxing Shares	2021	7.41055e+09	C26	1	2020	600796	Qianjiang Biochemical	1.16036e+09	Chemical raw materials and chemical products manufacturing industry	-6250199552	6250199552
600080	Jinhua Shares	2021	1.87019e+09	C27	1	2020	000513	Livzon Group	2.05908e+10	Pharmaceutical Manufacturing	18720628736	18720628736
600109	Guojin Securities	2016	4.7961e+10	J67	1	2015	002500	Shanxi Securities	48180649011	Capital Market Services	219676624	219676624
600112	STTiancheng	2018	2.47057e+09	C38	1	2017	300569	Tianneng Heavy Industry	2.47479e+09	Electrical machinery and equipment manufacturing industry	4.22231e+06	4.22231e+06
600112	STTiancheng	2020	1.24516e+09	C38	1	2019	002580	Sacred Sun Shares	1.91149e+09	Electrical machinery and equipment manufacturing industry	666324928	666324928
600112	Tiancheng Holdings	2021	1.38239e+09	C38	1	2020	002452	Changgao Electric	3.61371e+09	Electrical machinery and equipment manufacturing industry	2231319808	2231319808
600120	Zhejiang Oriental	2016	1.12679e+10	J69	1	2015	600643	Aijian Group	10728275129	Other financial industries	-539663488	539663488
600135	Lucky Film	2019	2.96785e+09	C26	1	2018	600378	Haohua Technology	8.27576e+09	Chemical raw materials and chemical products manufacturing industry	5307906048	5307906048
600150	Chinese Shipbuilding	2017	5.23266e+10	C37	1	2016	600893	Aero Engine	4.93454e+10	Railway, shipbuilding, aerospace and other transportation equipment manufacturing	-2981157632	2981157632
600167	Luen Mei Holdings	2019	1.21016e+10	D44	1	2018	600780	Tongbao Energy	1.19751e+10	Electricity, heat production and supply industry	-126493544	126493544
600185	Gree Real Estate	2019	3.22182e+10	K70	1	2018	000631	Shunfa Hengye	1.26304e+10	Real Estate	-19587768320	19587768320
600186	*STlotus	2015	2.24554e+09	C14	1	2014	600866	Star Lake Technology	2.25553e+09	Food Manufacturing	9992006	9992006
600193	STCreation	2016	3.01242e+08	E50	1	2015	900939	HuiliB	8.01967e+07	Building decoration and other construction industries	-221045136	221045136
600193	STCreation	2017	2.79122e+08	E50	1	2016	900939	HuiliB	9.16274e+07	Building decoration and other construction industries	-187495040	187495040
600193	STCreation	2018	3.34549e+08	E50	1	2017	900939	HuiliB	9.62754e+07	Building decoration and other construction industries	-238273712	238273712
600195	China Animal Husbandry Co., Ltd.	2020	6.76564e+09	C27	1	2019	000623	Jilin Aodong	2.58009e+10	Pharmaceutical Manufacturing	19035262976	19035262976
600196	Fosun Pharma	2021	9.32938e+10	C27	1	2020	002332	Xianju Pharmaceutical	6.83823e+09	Pharmaceutical Manufacturing	-86455558144	86455558144
600209	STRawdon	2019	6.6421e+08	E50	1	2018	600193	Creative Resources	3.34549e+08	Building decoration and other construction industries	-329661280	329661280
600213	Asiastar Bus	2021	3.19729e+09	C36	1	2020	002190	Chengfei Integration	3.54817e+09	Automotive Manufacturing	350876768	350876768
600227	St. Francis Church	2018	6.66895e+09	C27	1	2017	002019	Yifan Pharmaceutical	8.76773e+09	Pharmaceutical Manufacturing	2098776576	2098776576
600247	STChengcheng	2017	8.98108e+08	F51	1	2016	600755	Xiamen International Trade Center	5.47732e+10	Wholesale Industry	53875130368	53875130368
600250	Nanfang Textile Co., Ltd.	2015	1.79076e+09	F51	1	2014	000705	Zhejiang Zhenyuan	1.80256e+09	Wholesale Industry	11804233	11804233
600250	Nanfang Textile Co., Ltd.	2016	1.71395e+09	F51	1	2015	600647	*STTongda	5.44551e+08	Wholesale Industry	-1169394048	1169394048
600256	Guanghui Energy	2015	4.08709e+10	B07	1	2014	000968	Blue Flame Holdings	1.54312e+10	Oil and gas extraction industry	-25439700992	25439700992
600267	Hisun Pharmaceuticals	2019	2.14656e+10	C27	1	2018	000597	Northeast Pharmaceutical	1.17187e+10	Pharmaceutical Manufacturing	-9746819072	9746819072
600267	Hisun Pharmaceuticals	2020	2.08598e+10	C27	1	2019	603963	Dali Pharmaceutical	5.61329e+08	Pharmaceutical Manufacturing	-20298442752	20298442752
600275	STChangyu	2015	3.85793e+08	C13	1	2014	002311	Haida Group	7.66578e+09	Agricultural and sideline food processing industry	7279986688	7279986688
600276	Hengrui Medicine	2021	3.92662e+10	C27	1	2020	600568	STZhongzhu	4.52533e+09	Pharmaceutical Manufacturing	-34740887552	34740887552
600281	Taihua shares	2016	2.1189e+09	C32	1	2015	002379	Macrotech Holdings	2.15474e+09	Non-ferrous metal smelting and rolling processing industry	35835524	35835524
600282	Nanjing Iron and Steel Co., Ltd.	2020	4.79063e+10	C31	1	2019	000761	Benxi Steel Plate	6.07314e+10	Ferrous metal smelting and rolling processing industry	12825139200	12825139200
600289	*STCommunications	2017	2.98227e+09	I65	1	2016	300299	Fuchun Shares	2.0773e+09	Software and information technology services	-904964608	904964608
600293	Three Gorges New Materials	2015	2.60412e+09	C30	1	2014	002066	Ruitai Technology	3.25783e+09	Non-metallic mineral products industry	653707968	653707968
600293	Three Gorges New Materials	2017	7.16161e+09	C30	1	2016	002297	Boyun New Materials	2.38819e+09	Non-metallic mineral products industry	-4773413376	4773413376
600293	Three Gorges New Materials	2019	6.86893e+09	C30	1	2018	000012	CSGA	19114234184	Non-metallic mineral products industry	12245306368	12245306368
600293	Three Gorges New Materials	2020	4.69096e+09	C30	1	2019	603385	Huida Bathroom	4.77077e+09	Non-metallic mineral products industry	79809416	79809416
600318	Suning Finance	2017	6.347e+09	J69	1	2016	000958	Power Investment and Financing	5.30162e+09	Other financial industries	-1045388416	1045388416
600318	Suning Finance	2018	5644903614	J69	1	2017	600599	STpanda	1.26943e+09	Other financial industries	-4375478272	4375478272
600332	Baiyun Mountain	2019	5.68937e+10	C27	1	2018	000534	Wanze shares	2.60195e+09	Pharmaceutical Manufacturing	-54291705856	54291705856
600340	China Fortune Land Development	2020	4.88762e+11	K70	1	2019	600743	Huayuan Real Estate	5.84792e+10	Real Estate	-430283128832	430283128832
600369	Southwest Securities	2017	6.36943e+10	J67	1	2016	000617	CNPC Capital	7.75296e+11	Capital Market Services	711601946624	711601946624
600370	Sanfangxiang	2018	1.76697e+09	C26	1	2017	600165	Ningke Biotechnology	2.29904e+09	Chemical raw materials and chemical products manufacturing industry	532071040	532071040
600399	STFugang	2018	7.93885e+09	C31	1	2017	600507	Fangda Special Steel	8.6165e+09	Ferrous metal smelting and rolling processing industry	677652672	677652672
600399	STFugang	2019	8.55255e+09	C31	1	2018	000708	CITIC Special Steel	7.6779e+09	Ferrous metal smelting and rolling processing industry	-874648192	874648192
600399	STFugang	2020	9.22353e+09	C31	1	2019	002075	Shagang Group	1.1513e+10	Ferrous metal smelting and rolling processing industry	2289474560	2289474560
600399	Fushun Special Steel	2021	1.02236e+10	C31	1	2020	002075	Shagang Group	1.31892e+10	Ferrous metal smelting and rolling processing industry	2965631232	2965631232
600401	Delisting Hairun	2015	1.5927e+10	C39	1	2014	300367	Network force retreat	1.58066e+09	Computer, communication and other electronic equipment manufacturing	-14346305536	14346305536
600401	Delisting Hairun	2016	1.93765e+10	C39	1	2015	300042	Netac Technology	8.82546e+08	Computer, communication and other electronic equipment manufacturing	-18493947904	18493947904
600401	Delisting Hairun	2017	1.34063e+10	C39	1	2016	600151	Aerospace Electromechanical	1.38005e+10	Computer, communication and other electronic equipment manufacturing	394195328	394195328
600401	Delisting Hairun	2018	7.29845e+09	C39	1	2017	300394	Tianfu Communication	8.89425e+08	Computer, communication and other electronic equipment manufacturing	-6409021440	6409021440
600421	*STYangfan	2016	6.38099e+07	C34	1	2015	300441	BOSS shares	6.08389e+08	General equipment manufacturing industry	544579136	544579136
600469	Fengshen Shares	2015	6.87007e+09	C29	1	2014	002585	Double Star New Materials	5.62331e+09	Rubber and plastic products industry	-1246760832	1246760832
600490	Pengxin Resources	2016	4.60447e+09	C32	1	2015	000612	Jiaozuo Wanfang	8.62833e+09	Non-ferrous metal smelting and rolling processing industry	4023865088	4023865088
600518	STKangmei	2018	7.31445e+10	C27	1	2017	600196	Fosun Pharma	6.1971e+10	Pharmaceutical Manufacturing	-11173475328	11173475328
600518	STKangmei	2019	6.45862e+10	C27	1	2018	600196	Fosun Pharma	7.05514e+10	Pharmaceutical Manufacturing	5965132800	5965132800
600518	STKangmei	2020	3.33261e+10	C27	1	2019	002880	Weiguang Biology	1.5854e+09	Pharmaceutical Manufacturing	-31740735488	31740735488
600518	Kangmei Pharmaceutical	2021	1.60543e+10	C27	1	2020	600535	Tasly	1.64937e+10	Pharmaceutical Manufacturing	439434400	439434400
600519	Kweichow Moutai	2017	1.3461e+11	C15	1	2016	000799	Jiugui Liquor	2.3608e+09	Wine, beverage and refined tea manufacturing industry	-132249321472	132249321472
600525	Changyuan Group	2018	1.80578e+10	C39	1	2017	002436	Fast Technology	4.43534e+09	Computer, communication and other electronic equipment manufacturing	-13622498304	13622498304
600525	Changyuan Group	2019	1.10516e+10	C39	1	2018	300319	Microgate Technology	3.15483e+09	Computer, communication and other electronic equipment manufacturing	-7896779264	7896779264
600525	Changyuan Group	2020	1.16917e+10	C39	1	2019	002600	Leading Intelligent Manufacturing	2.73178e+10	Computer, communication and other electronic equipment manufacturing	15626034176	15626034176
600525	Changyuan Group	2021	1.16674e+10	C39	1	2020	688159	Youfang Technology	1.29775e+09	Computer, communication and other electronic equipment manufacturing	-10369639424	10369639424
600537	E-Chip Optoelectronics	2019	6.43369e+09	C38	1	2018	600478	Keliyuan	6.34901e+09	Electrical machinery and equipment manufacturing industry	-84677936	84677936
600537	E-Chip Optoelectronics	2020	7.50918e+09	C38	1	2019	002242	Joyoung Co., Ltd.	7.4678e+09	Electrical machinery and equipment manufacturing industry	-41378288	41378288
600575	Wanjiang Logistics	2015	6.23157e+09	G55	1	2014	600798	Ningbo Shipping	6.3984e+09	Water transport industry	166831312	166831312
600589	Guangdong Rongtai	2021	1.85646e+09	C26	1	2020	600277	Elion Clean Energy	3.64218e+10	Chemical raw materials and chemical products manufacturing industry	34565316608	34565316608
600593	Dalian Sun Asia	2021	2.09133e+09	N78	1	2020	603136	Tianmu Lake	1.609e+09	Public facilities management industry	-482334272	482334272
600594	Yibai Pharmaceutical	2019	5.61802e+09	C27	1	2018	002603	Yiling Pharmaceutical	8.55722e+09	Pharmaceutical Manufacturing	2939203840	2939203840
600594	Yibai Pharmaceutical	2020	5.22639e+09	C27	1	2019	603222	Jimin Medical	2.08449e+09	Pharmaceutical Manufacturing	-3141896448	3141896448
600598	Beidahuang	2015	7.23473e+09	A01	1	2014	600108	Ascend Group	7.61083e+09	agriculture	376095104	376095104
600598	Beidahuang	2016	7.74225e+09	A01	1	2015	600108	Ascend Group	7.61939e+09	agriculture	-122862424	122862424
600601	Founder Technology	2018	1.10314e+10	C39	1	2017	300516	Jiuzhiyang	1.28192e+09	Computer, communication and other electronic equipment manufacturing	-9749517312	9749517312
600601	Founder Technology	2019	9.97108e+09	C39	1	2018	002055	Derun Electronics	1.0163e+10	Computer, communication and other electronic equipment manufacturing	191874832	191874832
600609	Jinbei Automobile	2021	4.42308e+09	C36	1	2020	002593	Sunrise Group	4.30678e+09	Automotive Manufacturing	-116303552	116303552
600610	*STYida	2017	4.3155e+08	C26	1	2016	002539	Yuntu Holdings	9.02244e+09	Chemical raw materials and chemical products manufacturing industry	8590887936	8590887936
600610	*STYida	2018	1.70086e+07	C26	1	2017	000691	Asia Pacific Industry	2.52988e+08	Chemical raw materials and chemical products manufacturing industry	235979136	235979136
600610	STYida	2020	1.39455e+09	C26	1	2019	600319	Yaxing Chemical	1.27899e+09	Chemical raw materials and chemical products manufacturing industry	-115563216	115563216
600610	Zhongyida	2021	1.3619e+09	C26	1	2020	000635	Yinglite	3.1342e+09	Chemical raw materials and chemical products manufacturing industry	1772305792	1772305792
600621	Huaxin Shares	2015	3.59959e+09	J67	1	2014	000617	CNPC Capital	2.20483e+09	Capital Market Services	-1394758144	1394758144
600621	Huaxin Shares	2016	4.37548e+09	J67	1	2015	900919	Delisting CourtB	1.28196e+09	Capital Market Services	-3093517312	3093517312
600643	Aijian Group	2015	10728275129	J69	1	2014	600517	State Grid Yingda	5.2448e+09	Other financial industries	-5483471872	5483471872
600651	Feilo Audio	2019	9.89755e+09	C38	1	2018	600983	Whirlpool	8.2944e+09	Electrical machinery and equipment manufacturing industry	-1603149824	1603149824
600651	*STFeile	2020	9.10846e+09	C38	1	2019	603507	Zhenjiang Shares	3.35579e+09	Electrical machinery and equipment manufacturing industry	-5752670208	5752670208
600651	Feilo Audio	2021	7.69605e+09	C38	1	2020	000585	Tepco withdraws	1.57526e+08	Electrical machinery and equipment manufacturing industry	-7538528768	7538528768
600652	*STTravel long	2018	1.00477e+09	I64	1	2017	002247	Juli Culture	5.60489e+09	Internet and related services	4600121856	4600121856
600653	Shenhua Holdings	2021	4.19109e+09	F52	1	2020	603719	Bestore	4.18388e+09	Retail	-7201776	7201776
600654	*STZhongan	2018	5.60203e+09	I65	1	2017	600476	Hunan Post Technology	4.0921e+08	Software and information technology services	-5192816640	5192816640
600654	*STZhongan	2019	5.41715e+09	I65	1	2018	603138	Massive Data	6.59067e+08	Software and information technology services	-4758082560	4758082560
600656	Delisting Boyuan	2015	9.98389e+08	F52	1	2014	000026	Fiyta	3.65778e+09	Retail	2659393024	2659393024
600663	Lujiazui	2016	7.98258e+10	K70	1	2015	000732	STTaihe	8.47816e+10	Real Estate	4955872768	4955872768
600666	*STReed	2017	7.18015e+09	C39	1	2016	002402	Heertai	1.59898e+09	Computer, communication and other electronic equipment manufacturing	-5581170176	5581170176
600666	STReed	2020	2.95218e+09	C39	1	2019	002214	Dali Technology	1.56771e+09	Computer, communication and other electronic equipment manufacturing	-1384468480	1384468480
600666	Oride	2021	2.62488e+09	C39	1	2020	300162	Ledman Optoelectronics	1.15969e+09	Computer, communication and other electronic equipment manufacturing	-1465196288	1465196288
600671	Tianmu Pharmaceutical	2015	2.80382e+08	C27	1	2014	600385	Delisting Jintai	2.30866e+08	Pharmaceutical Manufacturing	-49516704	49516704
600671	Tianmu Pharmaceutical	2016	3.06193e+08	C27	1	2015	600252	Zhongheng Group	6.1301e+09	Pharmaceutical Manufacturing	5823904256	5823904256
600677	*STAir Communication	2019	6.2828e+09	F51	1	2018	300184	Power Source Information	6.46616e+09	Wholesale Industry	183361936	183361936
600680	*STShangpu	2018	1.89506e+09	C39	1	2017	603528	Duolun Technology	2.036e+09	Computer, communication and other electronic equipment manufacturing	140945856	140945856
600687	*STGangtai	2018	1.1352e+10	C41	1	2017	600086	Delisted Jinyu	1.25206e+10	Other manufacturing industries	1168556544	1168556544
600689	Shanghai Sanmao	2016	7.93013e+08	C17	1	2015	600493	Fengzhu Textile	9.99753e+08	Textile Industry	206740160	206740160
600696	STrock	2015	1.37121e+09	C15	1	2014	600084	Sino-Portuguese Shares	3.96371e+09	Wine, beverage and refined tea manufacturing industry	2592504064	2592504064
600696	STrock	2016	5.47063e+08	C15	1	2015	000995	Huangtai Wine	5.36295e+08	Wine, beverage and refined tea manufacturing industry	-10768411	10768411
600696	STrock	2018	4.1441e+08	C15	1	2017	000568	Luzhou Laojiao	1.97558e+10	Wine, beverage and refined tea manufacturing industry	19341350912	19341350912
600699	Joyson Electronics	2018	5.93202e+10	C36	1	2017	603788	Ningbo Gaofa	2.274e+09	Automotive Manufacturing	-57046179840	57046179840
600699	Joyson Electronics	2020	5.62651e+10	C36	1	2019	603089	Zhengyu Industry	1.55422e+09	Automotive Manufacturing	-54710927360	54710927360
600703	Sanan Optoelectronics	2019	2.96806e+10	C39	1	2018	603496	Hengwei Technology	9.13641e+08	Computer, communication and other electronic equipment manufacturing	-28766961664	28766961664
600727	Lubei Chemical	2020	4.56692e+09	C26	1	2019	300575	Zhongqi Shares	2.24039e+09	Chemical raw materials and chemical products manufacturing industry	-2326529536	2326529536
600733	BAIC BluePark	2018	4.32985e+10	C36	1	2017	603306	Chinachem Technology	2.40955e+09	Automotive Manufacturing	-40888901632	40888901632
600747	*STBig Control	2015	2.56501e+09	F51	1	2014	000062	Shenzhen Huaqiang	4.04614e+09	Wholesale Industry	1481131776	1481131776
600747	*STBig Control	2017	2.39658e+09	F51	1	2016	000062	Shenzhen Huaqiang	6.92265e+09	Wholesale Industry	4526066688	4526066688
600764	China Haiphong	2017	1.61538e+09	C39	1	2016	000045	Deep TextileA	4.11959e+09	Computer, communication and other electronic equipment manufacturing	2504202496	2504202496
600771	Guangyuyuan	2019	3.53736e+09	C27	1	2018	600518	STKangmei	7.31445e+10	Pharmaceutical Manufacturing	69607129088	69607129088
600781	Furen Pharmaceutical	2016	1.27293e+09	C27	1	2015	000534	Wanze shares	3.28942e+09	Pharmaceutical Manufacturing	2016488704	2016488704
600781	STFu Jen	2019	1.1736e+10	C27	1	2018	002932	Mingde Biotechnology	6.17147e+08	Pharmaceutical Manufacturing	-11118842880	11118842880
600781	*STFu Jen	2020	1.09174e+10	C27	1	2019	300558	Beda Pharmaceuticals	4.13333e+09	Pharmaceutical Manufacturing	-6784087040	6784087040
600800	Tianjin Magnetic Card	2015	6.44064e+08	C26	1	2014	002666	Delian Group	2.00203e+09	Chemical raw materials and chemical products manufacturing industry	1357960704	1357960704
600800	Tianjin Magnetic Card	2016	5.99149e+08	C26	1	2015	002057	Sinosteel Tianyuan	6.02666e+08	Chemical raw materials and chemical products manufacturing industry	3.517e+06	3.517e+06
600806	Delisting Kunji	2017	1.69164e+09	C34	1	2016	601002	Jinyi Industrial	4.24302e+09	General equipment manufacturing industry	2551386368	2551386368
600807	STTianye	2019	4.2384e+09	K70	1	2018	000517	Rongan Real Estate	2.43159e+10	Real Estate	20077465600	20077465600
600807	Tianye shares	2021	6.18194e+09	K70	1	2020	000608	Sunshine Holdings	5.92379e+09	Real Estate	-258148752	258148752
600810	Shenma Shares	2017	9.93182e+09	C28	1	2016	000936	Huaxi Shares	8.7588e+09	Chemical fiber manufacturing industry	-1173016448	1173016448
600810	Shenma Shares	2018	1.09646e+10	C28	1	2017	603225	Xinfengming	1.10509e+10	Chemical fiber manufacturing industry	86314984	86314984
600822	Shanghai Material Trade	2015	5.38702e+09	F51	1	2014	603003	Longyu Shares	1.70634e+09	Wholesale Industry	-3680676096	3680676096
600822	Shanghai Material Trade	2016	2.07806e+09	F51	1	2015	000096	Guangju Energy	2.21705e+09	Wholesale Industry	138993328	138993328
600822	Shanghai Material Trade	2017	2.03951e+09	F51	1	2016	000705	Zhejiang Zhenyuan	2.01714e+09	Wholesale Industry	-22372176	22372176
600830	Fragrant Fusion	2019	2.94426e+09	L71	1	2018	603300	Huatie Emergency	6.08087e+09	Rental Industry	3136605440	3136605440
600830	Fragrant Fusion	2020	2.98524e+09	L71	1	2019	603300	Huatie Emergency	5.18183e+09	Rental Industry	2196593664	2196593664
600830	Fragrant Fusion	2021	3.51806e+09	L71	1	2020	603300	Huatie Emergency	7.3975e+09	Rental Industry	3879440896	3879440896
600857	Ningbo Zhongbai	2021	9.58466e+08	F52	1	2020	002419	Tianhong Shares	1.78058e+10	Retail	16847308800	16847308800
600859	Wangfujing	2020	2.20037e+10	F52	1	2019	002187	Guangbai shares	4.30227e+09	Retail	-17701404672	17701404672
600874	Entrepreneurship and Environmental Protection	2021	21065292000	D46	1	2020	000685	Zhongshan Public Utilities	2.08885e+10	Water production and supply industry	-176789488	176789488
600958	Orient Securities	2017	2.3186e+11	J67	1	2016	600999	China Merchants Securities	2.43058e+11	Capital Market Services	11198439424	11198439424
600966	Bohui Paper	2015	1.21397e+10	C22	1	2014	002078	Sun Paper	1.62933e+10	Paper and paper products industry	4153523968	4153523968
600983	Whirlpool	2018	8.2944e+09	C38	1	2017	002560	Tongda Shares	2.46587e+09	Electrical machinery and equipment manufacturing industry	-5828523520	5828523520
600983	Whirlpool	2020	7.01316e+09	C38	1	2019	600854	Chunlan Shares	2.09927e+09	Electrical machinery and equipment manufacturing industry	-4913883648	4913883648
600986	Kodak shares	2015	8.88452e+09	I64	1	2014	002425	Caesar Culture	1.78198e+09	Internet and related services	-7102539776	7102539776
600998	Jiuzhoutong	2021	8.59359e+10	F51	1	2020	600704	Property Zhongda	1.06653e+11	Wholesale Industry	20716732416	20716732416
601010	Wenfeng Shares	2017	6.50731e+09	F52	1	2016	600723	Shoushang Shares	6.43215e+09	Retail	-75153328	75153328
601012	LONGi Green Energy Technology Co., Ltd.	2020	8.76348e+10	C38	1	2019	300069	Jinlihua Electric	5.88604e+08	Electrical machinery and equipment manufacturing industry	-87046225920	87046225920
601066	CITIC Construction Investment	2019	2.8567e+11	J67	1	2018	601881	China Galaxy	2.51363e+11	Capital Market Services	-34306332672	34306332672
601066	CITIC Construction Investment	2020	3.71228e+11	J67	1	2019	601375	Centaline Securities	4.35699e+10	Capital Market Services	-327658242048	327658242048
601099	Pacific Ocean	2016	4.03647e+10	J67	1	2015	601377	Industrial Securities	1.13818e+11	Capital Market Services	73453355008	73453355008
601099	Pacific Ocean	2020	2.26585e+10	J67	1	2019	603093	Nanhua Futures	1.40503e+10	Capital Market Services	-8608243712	8608243712
601101	Haohua Energy	2019	2.50452e+10	B06	1	2018	601001	Jinkong Coal	2.53672e+10	Coal mining and washing industry	321988448	321988448
601101	Haohua Energy	2020	2.48765e+10	B06	1	2019	600123	Orchid Science and Technology	2.55599e+10	Coal mining and washing industry	683422400	683422400
601101	Haohua Energy	2021	2.85792e+10	B06	1	2020	601918	New Energy	2.84668e+10	Coal mining and washing industry	-112490152	112490152
601117	China Chemical	2016	8.38842e+10	E48	1	2015	600820	Tunnel shares	6.28869e+10	Civil Engineering and Construction	-20997255168	20997255168
601155	Sunac China Holdings	2019	462110080567	K70	1	2018	001979	China Merchants Shekou	4.23221e+11	Real Estate	-38888632320	38888632320
601211	Guotai Junan	2021	791272814529	J67	1	2020	601688	Huatai Securities	7.16751e+11	Capital Market Services	-74521583616	74521583616
601318	Ping An of China	2021	10142026000000	J68	1	2020	601628	China Life	4252410000000	Insurance	-5889615986688	5889615986688
601377	Industrial Securities	2016	1.36535e+11	J67	1	2015	600864	Harbin Investment Group	6.23221e+09	Capital Market Services	-130302615552	130302615552
601377	Industrial Securities	2017	1.53055e+11	J67	1	2016	000728	Guoyuan Securities	7.1689e+10	Capital Market Services	-81366360064	81366360064
601519	Great Wisdom	2015	2.89515e+09	J69	1	2014	002423	COFCO Capital	3.54286e+09	Other financial industries	647713024	647713024
601519	Great Wisdom	2016	1.64874e+09	J69	1	2015	000416	*STCivil Control	1.42097e+09	Other financial industries	-227769408	227769408
601519	Great Wisdom	2017	2.00119e+09	J69	1	2016	600816	STJianyuan	1.91257e+10	Other financial industries	17124505600	17124505600
601519	Great Wisdom	2018	2.03138e+09	J69	1	2017	002647	Rendong Holdings	2.84797e+09	Other financial industries	816588928	816588928
601519	Great Wisdom	2019	2.05081e+09	J69	1	2018	600599	STpanda	9.4218e+08	Other financial industries	-1108629760	1108629760
601519	Great Wisdom	2020	1.97552e+09	J69	1	2019	300803	compass	1506397892	Other financial industries	-469123520	469123520
601558	STRuidian	2015	13199555144	C34	1	2014	002011	Shield Environment	1.03976e+10	General equipment manufacturing industry	-2801998336	2801998336
601558	STRuidian	2016	9.20986e+09	C34	1	2015	300260	Xinlai Materials	1.01486e+09	General equipment manufacturing industry	-8195008000	8195008000
601558	STRuidian	2017	6.70695e+09	C34	1	2016	002122	Huizhou Intelligence	6.64837e+09	General equipment manufacturing industry	-58583876	58583876
601558	STRuidian	2018	6.25714e+09	C34	1	2017	002483	Runbang Shares	4.35762e+09	General equipment manufacturing industry	-1899522688	1899522688
601566	Jiumuwang	2019	5.80719e+09	C18	1	2018	600400	Hongdou Shares	5.48323e+09	Textile, clothing and apparel industry	-323962400	323962400
601599	Lukang Culture	2016	5.09086e+09	C17	1	2015	600987	Hangmin Shares	4.03563e+09	Textile Industry	-1055237824	1055237824
601600	Aluminum Corporation of China	2015	189269251000	C32	1	2014	600362	Jiangxi Copper	95322374877	Non-ferrous metal smelting and rolling processing industry	-93946880000	93946880000
601607	Shanghai Pharmaceuticals	2019	1.37026e+11	F52	1	2018	600865	Top 100 Group	2.07918e+09	Retail	-134947217408	134947217408
601628	China Life	2020	4252410000000	J68	1	2019	601601	China Pacific Insurance	1528333000000	Insurance	-2724076978176	2724076978176
601717	Zhengzhou Coal Mine Machinery Co., Ltd.	2018	2.76909e+10	C36	1	2017	000581	Weifu Hi-Tech	2.0231e+10	Automotive Manufacturing	-7459848704	7459848704
601778	JinkoSolar	2020	2.93068e+10	D44	1	2019	000939	Kadi Retreat	3.02513e+10	Electricity, heat production and supply industry	944427840	944427840
601881	China Galaxy	2020	4.4573e+11	J67	1	2019	000776	GF Securities	3.94391e+11	Capital Market Services	-51339153408	51339153408
601901	Founder Securities	2017	1.48336e+11	J67	1	2016	600369	Southwest Securities	7.09997e+10	Capital Market Services	-77336567808	77336567808
601901	Founder Securities	2019	1.36595e+11	J67	1	2018	600999	China Merchants Securities	3.04931e+11	Capital Market Services	168335507456	168335507456
601933	Yonghui Supermarket	2019	5.2353e+10	F52	1	2018	600386	North Pakistan Media	4.80741e+09	Retail	-47545610240	47545610240
601989	China Heavy Industry	2016	1.84283e+11	C37	1	2015	601766	CRRC	311693729000	Railway, shipbuilding, aerospace and other transportation equipment manufacturing	127410798592	127410798592
601990	Nanjing Securities	2018	2.47751e+10	J67	1	2017	002500	Shanxi Securities	51650852754	Capital Market Services	26875713536	26875713536
601995	CICC	2020	521620499616	J67	1	2019	601901	Founder Securities	1.36595e+11	Capital Market Services	-385025310720	385025310720
603009	Beite Technology	2017	2.02622e+09	C36	1	2016	000572	Haima Automobile	1.81981e+10	Automotive Manufacturing	16171914240	16171914240
603009	Beite Technology	2020	3.27947e+09	C36	1	2019	600609	Jinbei Automobile	6.024e+09	Automotive Manufacturing	2744528640	2744528640
603010	Wansheng shares	2019	2.05296e+09	C26	1	2018	002057	Sinosteel Tianyuan	1.76556e+09	Chemical raw materials and chemical products manufacturing industry	-287399040	287399040
603010	Wansheng shares	2020	2.41948e+09	C26	1	2019	300072	Haixin Energy	2.13557e+10	Chemical raw materials and chemical products manufacturing industry	18936236032	18936236032
603016	New Hongtai	2016	9.27288e+08	C38	1	2015	300444	Shuangjie Electrical	1.21165e+09	Electrical machinery and equipment manufacturing industry	284357152	284357152
603059	Double Clean	2018	1.0757e+09	C41	1	2017	002718	AIA ceiling	1.4177e+09	Other manufacturing industries	342000320	342000320
603088	Ningbo Jingda	2021	1.15517e+09	C35	1	2020	002097	Sunward	1.73584e+10	Special equipment manufacturing industry	16203206656	16203206656
603111	Connie Electrical and Mechanical	2020	5.41447e+09	C37	1	2019	600391	AECC	5.41166e+09	Railway, shipbuilding, aerospace and other transportation equipment manufacturing	-2803694	2803694
603111	Connie Electrical and Mechanical	2021	5.83724e+09	C37	1	2020	600391	AECC	5.80866e+09	Railway, shipbuilding, aerospace and other transportation equipment manufacturing	-28585396	28585396
603123	Cuiwei Shares	2019	5.3998e+09	F52	1	2018	600712	Nanning Department Store	2.04829e+09	Retail	-3351514880	3351514880
603189	Netda Software	2017	8.54981e+08	I65	1	2016	300552	Wanji Technology	1.09134e+09	Software and information technology services	236355520	236355520
603189	Netda Software	2019	9.7778e+08	I65	1	2018	300002	Shenzhou Taiyue	6.63498e+09	Software and information technology services	5657200128	5657200128
603198	Yingjia Gongjiu	2015	5.24863e+09	C15	1	2014	000752	*STWest	1.37808e+09	Wine, beverage and refined tea manufacturing industry	-3870553600	3870553600
603213	Zhenyang Development	2021	2.08457e+09	C26	1	2020	600096	Yuntianhua	5.29888e+10	Chemical raw materials and chemical products manufacturing industry	50904215552	50904215552
603259	WuXi AppTec	2019	2.92391e+10	M73	1	2018	600645	Zhongyuan Concord	4.44343e+09	Research and experimental development	-24795707392	24795707392
603516	TRICHOON TECHNOLOGY	2018	8.08701e+08	C39	1	2017	300647	Overclocking Three	1.08453e+09	Computer, communication and other electronic equipment manufacturing	275827680	275827680
603555	Guirenniao	2018	4.75303e+09	C18	1	2017	603157	Delisting Lasha	7871712000	Textile, clothing and apparel industry	3118685696	3118685696
603555	Guirenniao	2019	3.85262e+09	C18	1	2018	603839	Anzheng Fashion	3.68978e+09	Textile, clothing and apparel industry	-162838848	162838848
603557	Start-up shares	2020	2.97047e+09	C19	1	2019	002674	Industrial Technology	2.97543e+09	Leather, fur, feathers and their products and footwear	4.96846e+06	4.96846e+06
603565	Middle Grain Flow	2020	1.15609e+10	G55	1	2019	600279	Chongqing Port	1.23531e+10	Water transport industry	792207936	792207936
603603	Botian Environment	2018	1.04433e+10	N77	1	2017	600475	Huaguang Environmental Energy	1.01433e+10	Ecological protection and environmental governance industry	-300039872	300039872
603703	Shengyang Technology	2016	8.43305e+08	C38	1	2015	300283	Wenzhou Hongfeng	8.34641e+08	Electrical machinery and equipment manufacturing industry	-8664431	8664431
603733	Xianhe Shares	2018	5.53463e+09	C22	1	2017	200986	Yuehua BaoB	5.42637e+09	Paper and paper products industry	-108260920	108260920
603766	Loncin General	2019	1.31312e+10	C37	1	2018	600765	AVIC Heavy Machinery	1.207e+10	Railway, shipbuilding, aerospace and other transportation equipment manufacturing	-1061204672	1061204672
603777	Laiyifen	2019	2.8663e+09	F52	1	2018	600824	Yimin Group	2.87072e+09	Retail	4428613	4428613
603816	Gujia Home	2016	5.21964e+09	C21	1	2015	002489	Zhejiang Yongqiang	5.81054e+09	Furniture Manufacturing	590903616	590903616
603822	Jiaao Environmental Protection	2020	2.03471e+09	C26	1	2019	603188	Yabang Shares	4.31628e+09	Chemical raw materials and chemical products manufacturing industry	2281577216	2281577216
603822	Jiaao Environmental Protection	2021	2.46217e+09	C26	1	2020	600731	Hunan Haili	2.97019e+09	Chemical raw materials and chemical products manufacturing industry	508027712	508027712
603836	Haicheng Bonda	2021	4.29993e+09	L72	1	2020	600093	Delisting is easy to see	8.29396e+09	Business Services	3994028032	3994028032
603866	Peach and plum bread	2019	5.18604e+09	C14	1	2018	002570	Beingmate	5.04549e+09	Food Manufacturing	-140556416	140556416
603878	Wujin Stainless Steel	2016	2.33032e+09	C31	1	2015	002756	Yongxing Materials	3.23693e+09	Ferrous metal smelting and rolling processing industry	906611840	906611840
603919	Jinhui Wine	2017	2.33303e+09	C15	1	2016	600616	Jinfeng Wine	2.44282e+09	Wine, beverage and refined tea manufacturing industry	109785840	109785840
603936	Bomin Electronics	2016	1.9227e+09	C39	1	2015	002104	Hengbao shares	1.92072e+09	Computer, communication and other electronic equipment manufacturing	-1.97998e+06	1.97998e+06
603939	Yifeng Pharmacy	2018	7.86814e+09	F52	1	2017	601366	Liqun Shares	7.82058e+09	Retail	-47566644	47566644
603991	Zhizheng Shares	2020	5.71713e+08	C29	1	2019	603033	Sanwei Shares	4.4378e+09	Rubber and plastic products industry	3866086400	3866086400
605003	Zhongwang Fabric	2020	1.10438e+09	C17	1	2019	600156	Huasheng Shares	1.10305e+09	Textile Industry	-1327011	1327011
605008	Changhong Hi-Tech	2020	2.28162e+09	C26	1	2019	600409	Sanyou Chemical	2.48041e+10	Chemical raw materials and chemical products manufacturing industry	22522523648	22522523648
605058	Aohong Electronics	2020	1.86508e+09	C39	1	2019	000938	Tsinghua Unigroup	5.47393e+10	Computer, communication and other electronic equipment manufacturing	52874182656	52874182656
605068	Mingxin Xuteng	2020	2.13263e+09	C19	1	2019	603557	STGetting Started	2.9265e+09	Leather, fur, feathers and their products and footwear	793877504	793877504
605118	LiDing Optoelectronics	2020	1.24225e+09	C39	1	2019	688019	Anjie Technology	9.91199e+08	Computer, communication and other electronic equipment manufacturing	-251049888	251049888
605168	Threesome	2020	2.43271e+09	L72	1	2019	002210	Pegasus International	2.57746e+09	Business Services	144748496	144748496
605255	Tianpu shares	2020	1.03481e+09	C29	1	2019	002735	Prince New Materials	1.20271e+09	Rubber and plastic products industry	167902448	167902448
605258	Concord Electronics	2020	1.36594e+09	C39	1	2019	300270	Zhongwei Electronics	1.32196e+09	Computer, communication and other electronic equipment manufacturing	-43979436	43979436
605299	Shuhua Sports	2020	2.01439e+09	C24	1	2019	300756	Golden Horse Amusement Park	1.70197e+09	Cultural, educational, arts and crafts, sports and entertainment products manufacturing	-312423872	312423872
605299	Shuhua Sports	2021	1.81254e+09	C24	1	2020	300756	Golden Horse Amusement Park	1.8097e+09	Cultural, educational, arts and crafts, sports and entertainment products manufacturing	-2839451	2839451
605499	Dongpeng Beverage	2021	7.79049e+09	C15	1	2020	603198	Yingjia Gongjiu	7.38129e+09	Wine, beverage and refined tea manufacturing industry	-409205440	409205440
688050	Aibo Medical	2020	1.63853e+09	C35	1	2019	002950	Ogilvy Medical	3.15572e+09	Special equipment manufacturing industry	1517189376	1517189376
688063	Payne Technology	2020	3.21376e+09	C38	1	2019	300427	*STRed Phase	4.7457e+09	Electrical machinery and equipment manufacturing industry	1531939712	1531939712
688077	Earth Bear	2020	1.45831e+09	C30	1	2019	600881	Yatai Group	5.94336e+10	Non-metallic mineral products industry	57975304192	57975304192
688135	Li Yang Chip	2020	1.09211e+09	C39	1	2019	000066	The Great Wall of China	2.16707e+10	Computer, communication and other electronic equipment manufacturing	20578607104	20578607104
688166	Borri Pharmaceuticals	2020	1.82779e+09	C27	1	2019	603456	Jiuzhou Pharmaceutical	4.67028e+09	Pharmaceutical Manufacturing	2842492928	2842492928
688179	Aladdin	2020	8.63548e+08	M73	1	2019	300404	Boji Pharmaceuticals	6.33082e+08	Research and experimental development	-230465696	230465696
688211	Zhongke Micro	2021	6.13718e+09	C34	1	2020	002529	Haiyuan Composite Materials	1.2343e+09	General equipment manufacturing industry	-4902876672	4902876672
688255	Kelda	2021	1.2263e+09	C34	1	2020	603915	Guomao Shares	4.00301e+09	General equipment manufacturing industry	2776709888	2776709888
688309	Hengyu Environmental Protection	2020	7.82981e+08	C35	1	2019	000925	Zhonghe Technology	7.32674e+09	Special equipment manufacturing industry	6543758336	6543758336
688314	Kangtuo Medical	2021	5.73379e+08	C35	1	2020	600587	Xinhua Medical	1.15538e+10	Special equipment manufacturing industry	10980468736	10980468736
688377	Dewell	2020	1.86316e+09	C35	1	2019	002645	Huahong Technology	2.5436e+09	Special equipment manufacturing industry	680438272	680438272
688379	Huaguang New Materials	2020	1.21039e+09	C33	1	2019	300488	Hengfeng Tools	1.19378e+09	Metal products industry	-16614208	16614208
688488	Aidi Pharmaceuticals	2020	1.44683e+09	C41	1	2019	603038	Huali Shares	1.4294e+09	Other manufacturing industries	-17430766	17430766
688510	Hangya Technology	2020	1.2108e+09	C37	1	2019	600150	Chinese Shipbuilding	4.43514e+10	Railway, shipbuilding, aerospace and other transportation equipment manufacturing	43140583424	43140583424
688550	Ruilian New Materials	2020	2.92477e+09	C26	1	2019	300135	Baoli International	2.89948e+09	Chemical raw materials and chemical products manufacturing industry	-25287732	25287732
688559	Sea star	2020	3.61381e+09	C35	1	2019	688016	Heart Pulse Medical	1.15571e+09	Special equipment manufacturing industry	-2458102016	2458102016
688567	Farasis Energy	2020	1.54176e+10	C38	1	2019	300222	HKUST Intelligence	6.35909e+09	Electrical machinery and equipment manufacturing industry	-9058549760	9058549760
