# Supplementary material for: Enhanced detection of accounting fraud using a CNN-LSTM-Attention model optimized by Sparrow search
Source: PeerJ Comput Sci. 2024 Nov 26;10:e2532. doi: 10.7717/peerj-cs.2532 (PMC11623018; doi:10.7717/peerj-cs.2532)
Supplement: Supplemental Information 7 [file peerj-cs-10-2532-s007.xlsx]

## Sheet: Sheet1
fraud	This refers to the illegal act of deception or dishonesty, usually with the aim of gaining financial benefits.
Fraud stock abbreviation	This is the abbreviation or symbol representing a stock that is associated with fraudulent activities.
Fraud year	The specific year when the fraud occurred or was detected in the stock or company.
Total assets fraud	This refers to fraudulent activities involving the misrepresentation of a company's total assets on financial statements, either inflating or understating them.
Industry Code	A numerical or alphanumerical code that identifies the industry in which a company operates, often used in classification systems such as NAICS or SIC codes.
Is it fraud?	A question asking whether the specific case or stock involved fraudulent activity (usually a "1" or "0" answer).
year	The year of reference for the data being examined, whether it's the year of fraud, financial reporting, or analysis.
Matching stock symbols	Stock symbols that correspond to companies or stocks under investigation for potential fraud. These are the symbols used in the stock market to represent companies.
Stock Name	The full name of the company associated with the stock symbol, often used in conjunction with financial or fraud-related data.
Total assets enterprise size	This refers to the size of the company based on its total assets, which reflects the overall value of what the company owns.
Industry Name	The name of the industry in which the company operates, such as "Technology," "Healthcare," or "Finance."
gap	This term usually refers to the difference between reported and actual figures, such as discrepancies in financial statements.
Absolute value of the gap	This refers to the non-negative value of the difference between the reported figure and the actual figure, ignoring whether the gap is positive or negative. It highlights the magnitude of the difference.
